First report of the Eocene bivalve *Schedocardia* (Mollusca, Cardiidae) from Cuba

JOHANSET ORIHUELA<sup>1\*</sup>

<sup>1</sup> Department of Earth and Environment (Geosciences), Florida International University,  
Miami, Florida 33199, USA, Email: [Jorih003@fiu.edu](mailto:Jorih003@fiu.edu) \* corresponding author

YASMANI CEBALLOS IZQUIERDO<sup>2</sup>

<sup>2</sup> Instituto de Geofísica y Astronomía, calle 212 No.2906 entre 29 y 31, La Coronela, La Lisa,  
La Habana, Cuba, Email: [yasmaniceballos@gmail.com](mailto:yasmaniceballos@gmail.com)

ROGER W. PORTELL<sup>3</sup>

<sup>3</sup> Florida Museum of Natural History, 1659 Museum Road, University of Florida, Gainesville,  
Florida 32611, USA, Email: [portell@flmnh.ufl.edu](mailto:portell@flmnh.ufl.edu)

## ABSTRACT

Herein we provide the first report of the rare cardiid bivalve *Schedocardia* from Cuba. The single, partial, valve external mold was derived from the Madruga Formation which is characterized by a richly diverse marine fauna including echinoderms, brachiopods, benthic and planktonic foraminiferans, but from which bivalves were not previously reported. The unit is considered late Paleocene in age (Thanetian), but the presence of *Schedocardia* supports a possible age extension of the formation into the early Eocene (Ypresian). Moreover, we provide a reconsideration of the historical factors that affected the accepted type locality of the outcrop, which allows for an alternative interpretation of the shallow water fauna found therein.

Keywords: Mollusca; Cardiidae; Fossils; Eocene; Madruga Formation; Cuba

## RESUMEN

Se reporta por primera vez el género bivalvo *Schedocardia* de la Formación Madruga, para el registro fósil de Cuba. De esta formación se ha reportado una rica fauna de invertebrados incluyendo equinodermos, braquiópodos y, especialmente de foraminíferos, pero no moluscos bivalvos. Se ha considerado que la Formación Madruga se depositó durante el Paleoceno tardío (Thanetiano), no obstante, la presencia de *Schedocardia* apoya la extensión de edad de la formación hasta el Eoceno temprano (Ypresiano). La consideración de factores antropogénicos que han afectado la localidad tipo de la formación nos permite ahora una interpretación alternativa del depósito y el ambiente de deposición.

Palabras clave: Molusco; Cardiido; Fósil; Eoceno; Madruga; Cuba

## INTRODUCTION

The Paleocene of Cuba is represented in localized outcrops throughout the island, but the best-known outcrops are perhaps those near the town of Madruga, in central-eastern Mayabeque Province, where a complex of ophiolites, Cretaceous volcanic rocks, and latest Cretaceous, Paleogene and Neogene age sedimentary formations crop out (Furrazola-Bermúdez et al., 1964; Albear et al., 1985).

This region has been the subject of paleontological investigations since the early-middle 20<sup>th</sup> century, as part of oil and mineral prospecting by North American companies (De Golyer, 1918; Lewis, 1932a, b; Palmer, 1932; Wright and Sweet, 1924). Based on field trips made between 1929 and 1946 around Cuba, Palmer (1948) compiled a list of fossil-bearing localities, including more than 70 sites for the town of Madruga. In his publication, Palmer mentioned a locality previously identified by Lewis (1932a) as “*Cut under railroad bridge two kilometers west of Madruga at Central San Antonio*” and cataloged it as a notable locality (Loc. 757 in Palmer, 1948). Since Lewis (1932a) had not selected a holotype (type section) nor did he record its faunal content, Bermúdez (1950) erected the roadcut under the railroad bridge as the type locality for the Madruga Formation (Loc. Bermúdez Sta. 76b) and assigned it a Paleocene age.

This locality was originally described as “Madruga marls” by Lewis (1932a), who erroneously considered it of Late Cretaceous age. Its fossil fauna was reported later by Palmer (1934), Palmer (1932, 1948), Cushman and Bermúdez (1948a, b, 1949), Bermúdez (1938, 1950), Cooper (1955, 1979), and Kier (1984). They had found mostly Cretaceous and Paleocene large foraminifers, but also assemblages consisting of small benthic and planktonic species including several index taxa (Palmer, 1934; Cushman and Bermúdez, 1948a, b, 1949; Bermúdez, 1950; Furrazola-Bermúdez et al., 1964; Lexicon, 2013). Interestingly,

brachiopods, scaphopods, and echinoid fragments were also reported. The brachiopods collected by Palmer, deposited in the U.S. National Museum, were later described and figured by Cooper (1955, 1979). Although these works provide a detailed account of the foraminifer faunule from the Madruga outcrop, bivalves had not been reported, and the echinoids and scaphopods still need investigation.

Recent fieldwork at this locality yielded several interesting, well-preserved fossil bivalve molds, representing a new addition to the fauna of the Madruga Formation undetected in over 80 years of collecting history at the site. Furthermore, our new observations contribute to the reinterpretation of the age and environment of deposition of the Madruga Formation.

## MATERIALS AND METHODS

### **Locality**

The Madruga Formation type section and collecting site of the bivalves herein reported is located at a highway cut near the Boris Luis Santa Coloma Sugar Plantation, outskirts of the town of Madruga, Mayabeque Province: GPS coordinates Lat. 22.906787°, Long. -81.872793°, datum WGS 84, altitude 159 m above modern sea level (taken from Google Earth). This is the same location, below the railroad bridge at the Carretera Central west of Madruga town, reported by Palmer (1948) as Loc. 757, and Loc. Sta. 76b in Bermúdez (1950). This section is the current lectostratotype of the Madruga Formation (Albear et al., 1985; Lexicon, 2013). The outcrop section discussed is ~4 m above the highway level, on each side. The bivalves herein were collected at a +1 m and +2.5 m (Fig.

1). This is nearby the original localities visited by Palmer and Bermúdez, but the exact locality of their collecting stations is unknown because they did not indicate them.

## **Geological setting: Lithology and Deposition environment**

The Madruga section has been described as brown or reddish-brown calcareous well-stratified, cemented, greywacke sandstones, sandy-shales, and shales with some conglomerate intercalations. Clastic material is derived from older Cretaceous volcanic-sedimentary rocks, which in the conglomerates can reach from 30 to 40 cm up to 1 to 2 m in diameter. Radiolarian sandstones have been reported (Cushman and Bermúdez, 1948a:68), but the origin of the silica (biogenic or volcanic) is unknown. The age of the unit was originally considered Late Cretaceous by Lewis (1932a:539, 1932b) but later defined as late Paleocene based on several index Foraminifera (Bermúdez, 1950, 1961; Furrázola-Bermúdez et al., 1964; Iturralde-Vinent, 2011).

Stratigraphically, the Madruga Formation lies concordant over the Mercedes Formation and discordant over the Peñalver (Late Cretaceous/early Paleocene) and Via Blanca Formations (Late Cretaceous) (Fig. 2). It is covered concordantly by the Capdevilla Formation (early Eocene) and discordantly by the Cojimar Formation (early-middle Miocene) and Nazareno Formation (late middle Eocene – late Eocene). The Cretaceous rocks ( $K_2^{cp-m?}$ ) can be confused with the overlying Paleocene layers (Albear et al., 1985; Franco, 1992; Lexicon, 2013). At the type locality, these contacts with other formations are not exposed within the outcrop but are exposed at nearby locations. Fossil specimens are sparse and rare throughout the outcrop.

The environment of deposition has been interpreted as a marine synorogenic piggyback basin of medium to deep depth (bathyal), formed under unstable tectonic environment, transportation, and turbidity currents (Bralower and Iturralde-Vinent, 1997; Iturralde-Vinent and MacPhee, 1999; Iturralde-Vinent et al., 2016). The Apollo and Capdevilla Formations are considered lateral facies representing shallower marine environments, whereas the Nazareno Formation constitutes a deeper, more turbid environment (Albear and Iturralde-Vinent, 1985; Fluegeman, 1999). The Cretaceous volcanic arc rocks and the localized ophiolite likely represent a mélangé complex (flyschoid, containing serpentinite and gabbro) exposure in the region. These were likely exposed during western Cuba's major overthrust events of the Eocene (Iturralde-Vinent, 1996, 2011, 2015).

## Abbreviations

*Institutional*— Specimen repository: Paleontology collection of the Madrugá Museum (MPAL). LBF-large benthic foraminifera; PKF, planktonic foraminifera; SBF, small benthic Foraminifera.

## RESULTS

### Systematic Paleontology

Class: Bivalvia Linnaeus, 1758

Order: Cardiida Ferussac, 1822

Family: Cardiidae Lamarck, 1809

*Cardium* Group (sensu Schneider, 2002)

Genus: *Schedocardia* Dall 1900

*Schedocardia* cf. *hatchetigbeensis* (Aldrich, 1886)

**Specimens-** MPAL-1001, deposited at the paleontology collection of the Museum of  
Madruga city. Collected by Yasmani Ceballos Izquierdo on June 2017, at 3-4 m west of the  
railroad bridge, on the north margin of the roadcut (Figs. 1-2).

**Description-** The fossil is an incomplete external mold in a calcareous matrix. The external  
mold is obliquely quadrate, elliptic-ovoid or schediform in shape (D in Schneider, 2002);  
radial ribs are narrow and nearly symmetrical throughout. There are small-simple foramina on  
the interstices between the radial ribs, valve margins crenulated. The interstices between  
radial ribs are wider than the width of the rib, wider spaced towards valve margin (Fig. 4).  
External ribs strongly expressed, but not alternating (i.e., wide to narrow) on a central slope.  
There are >19 ribs present on our specimen, but the exact number is unknown due to  
incompleteness. The spines or their foramina are more pronounced in the lower valve  
margins, in the near-symmetrical organization. Only the upper part of the valve external mold  
is visible. No spines or nobs present. Flanking ribs closely packed together. Cardinals, muscle  
scars, or hinge not visible (Fig. 4). The umbo is generally incomplete, but likely opisthogyal  
and wide. Marked, ovoid-shaped and incised foramina occur almost symmetrically along the  
curved-space between the valve ribs (Fig. 4). In cross-section, these either extend straight  
down or curved at the deepest tip. They may be alternating spines.

A smaller cardiid specimen is embedded in the same sample opposite this cast (not illustrated  
here).

## DISCUSSION

### Identification

The specimen (MPAL-1001) is comparable to *Schedocardia waiparana* Freneix and Grant-Mackie 1978, *Schedocardia juncea* (Olsson 1930), and *Schedocardia gatunense* (Dall 1900), in their elliptic-ovate shape of the valve and higher, less oblique shell anteriorly (Figs. 3-5). However, it differs from these three species in having prominent ribs near the umbo, many more costae, interstices that are flat but wide, not narrow, and ribs that do not bear beads (as in *S. gatunense*). In that sense, our specimen agrees closely with *Schedocardia hatchetigbeensis* (Aldrich 1886) in having narrower interstices, lacking rib beads, and having low spines inside these spaces. Since our specimen is incomplete, we tentatively refer it here to *S. cf. hatchetigbeensis* until further specimens are available (Fig. 5).

In addition to the *Schedocardia*, another cardiid bivalve, *Acanthocardia* (MPAL-1002), was discovered in the same deposit (Fig. 6). This specimen has an obliquely quadrate shell, with 21 visible ribs, crenulate valve margins, and spinose/nodose ribs. Probable double ribs can be seen on the imbricated valve side. Although the specimen is incomplete, it resembles in overall morphology *Acanthocardia tuberculata* (Linnaeus 1758) and *Acanthocardia mucronata* (Linnaeus 1758). However, the specimen is too incomplete to assign to species.

## Chronology

The Madruga Formation has been formerly assigned to the late Paleocene (upper) by the researchers of the Cuban Geological Lexicon and others (Sánchez-Roig, 1949; Sachs, 1957; Bermúdez, 1950, 1961; Furrázola-Bermúdez et al., 1964; Lexicon, 2013) based on the presence of several index taxa, such as the planktic foram *Morozovella velascoensis* (Cushman 1925), index of PKF zone P5, and *Pseudophragmina* (= *Athecocyclina*) *stephensoni* (Vaughan 1929), a large benthic foraminifer of carbonate banks (Özcan et al., 2019). More recently, researchers have extended the age of the formation to the early Eocene (Ypresian)



due to the presence of the LBF *Euconuloides wellsi* (Cole and Bermúdez, 1944), which is absent in Paleogene assemblages (Blanco-Bustamante et al., 1999). The genus *Schedocardia* appears in the fossil record in the late Paleocene (Keen, 1980; Schneider, 2002), but apparently did not have its acme until the Eocene. *Schedocardia hatchetigbeensis* has been reported from the early Eocene (Ypresian) of Alabama and Texas, USA (Toulmin, 1977; Sessa et al., 2012). Other *Schedocardia* species, such as *S. juncea* and *S. gatunense* are reported from the late Eocene of Panama, Venezuela, Colombia, and Peru (Woodring, 1982). Therefore, the genus is generally considered to be an Eocene indicator (Woodring, 1982:542). The occurrence of *Schedocardia* in the Madruga Formation seems to support the extension of the Cuban formation at least to the early Eocene. Cushman and Bermúdez (1948a, b) correlated the Madruga Formation with late Paleocene formations from Alabama and Texas, so it is not so surprising that *S. cf. hatchetigbeensis* appears here. These North American formations are now considered early Eocene (Toulmin, 1977; Sessa et al., 2012).

## Environment

*Schedocardia* and *Acanthocardia* are considered facultative mobile infaunal (benthic) suspension feeders (Clarkson, 1986). Their presence, along with multiple large benthic forams (LBF's), echinoids, and brachiopods suggests that after the late Paleocene, during the early Eocene, the area of deposition became a shallower marine environment, like the lateral facies Apollo and Capdevilla Formations, or were redeposited from shallower environments into deeper by more turbid environments (Blanco-Bustamante et al., 1999). The presence of the conglomerates and polymictic elements may suggest closer proximity to a deltaic environment. Moreover, these suggests that at least some of the fauna reported for the Madruga Formation may have originated in shallower waters of a nearby shelf-forereef

environment, transported or reworked by currents or other agents into deeper depositional environments interpreted in the current literature (Albear et al., 1985; Franco et al., 1992; Iturralde-Vinent, 2011; Lexicon, 2013). This interpretation agrees with the overall trend in the orogenic activity of the Cuban terrain during the early-middle Eocene (Bralower and Iturralde-Vinent, 1997; Iturralde-Vinent and MacPhee, 1999; Iturralde, 1996, 2011; Iturralde-Vinent et al., 2016). However, much more evidence is needed to support these observations and hypotheses.

## **Limitations and final considerations**

Our observations call attention to several limitations that must be considered for our current interpretation of this outcrop and its fauna. The construction of the highway highly disturbed the area of the outcrop. At the time of the Palmer and Bermúdez visits, those outcrops were well-exposed due to the recent highway construction but are currently severely deteriorated or disturbed by urbanization. Windows into the fossil-bearing strata are rare due to vegetation and soil cover (YCI unp. observations). Former investigators, however, did not take into consideration the anthropogenic alterations inflicted on the local stratigraphy by the construction of the roads (Figs. 1, 6). These modifications seem to have severely altered or mixed the bedding at our collecting locality (Fig. 7.2), and the horizontality of several beds at several locations. The use of dynamite and heavy machinery likely affected the local stratigraphy and occurrence of its fossil fauna, which up to now has not been considered in any of the published accounts of the outcrop since the 1920's (Fig. 7).

Furthermore, the historic photographs taken during the construction of the highway and overpass show the presence of a more lithified outcrop-base than the more friable, marly, polymictic sandstones covered by soil and vegetation of today. It is possible that large boulders now present in the outcrop were positioned there then. All these factors, and the

presence of these hitherto unreported faunal components prompt a reassessment of the whole outcrop that could help clarify the stratigraphy, fauna, and age of the Madruga Formation and its formational history. Much more data is needed to test some of these initial observations and hypotheses. However, we are confident that such an investigation will reveal a far richer Madruga Formation than currently characterized.

## CONCLUSIONS

The Paleocene bivalve fauna of Cuba has been scantily investigated, although outcrops of marine sedimentary rocks of this age are widespread throughout the island. One of the foremost Paleocene Cuban geologic units is the Madruga Formation, which occurs near the town of Madruga, in eastern Mayabeque Province. This formation has produced diverse foraminifera, brachiopod, and echinoid faunas, but bivalves up to now have not been reported. Herein, we expand the chronologic and paleoenvironmental setting by recording the cardiid bivalve genus *Schedocardia*, which is the first report for the Cuban fossil record. Historical insight gleaned from photographs taken during the construction of the highway call attention to the high level of disturbance and anthropogenization which the outcrop has been subjected since the late 1920's and cautions as to the depositional and chronologic interpretation of the samples taken there since. Moreover, our observations call for a reassessment of the stratotype outcrop and the Madruga Formation.

## ACKNOWLEDGMENTS

We thank Manuel Iturralde-Vinent for his observations and comments that greatly improved earlier versions of the manuscript, Jan Johan ter Poorten for his aid in the identification of the Cuban *Schedocardia* specimen and Madruga city historian Carlos Miguel Suárez Sardiñas for

providing important historical insight, historical photographs, and aid during the fieldwork. Furthermore, our manuscript was improved by comments and suggestions of Lazaro Viñola López. Sandy Ebersole and Lynn Harrell kindly loaned the *S. hatchetigbeensis* valve exhibited in Figure 5 and Sean Roberts assisted with specimen imaging.

## REFERENCES

- Albear, J. F. and Iturralde-Vinent, et al. 1977. Memoria explicativa del mapa geológico escala 1:250 000 de las provincias de La Habana (unpublished). Fondo Geológico de Cuba, Instituto de Geología y Paleontología de la Academia de Ciencias de Cuba, La Habana, Cuba.
- Albear, J. F., Iturralde-Vinent, M., Furrázola-Bermúdez, G., and Sánchez-Arango, J. R. 1985. Contribución a la geología de las provincias de La Habana y Ciudad de la Habana. Editorial Científico-Técnica, La Habana.
- Aldrich, T. H. 1886. Preliminary report on the Tertiary fossils of Alabama and Mississippi. *Bulletin of the Geological Survey of Alabama*, part I:15–60.
- Bermúdez, P. J. 1938. Nueva especie de *Bulimina* del Cretácico Superior cubano. *Memorias de la Sociedad Cubana de Historia Natural “Felipe Poey”*, 12(2):80–90.
- Bermúdez, P. J. 1950. Contribución al estudio del Cenozoico cubano. *Memorias de la Sociedad Cubana de Historia Natural “Felipe Poey”*, 19(3):204–375.
- Bermúdez, P. J. 1961. *Las Formaciones Geológicas de Cuba*. Ministerio de Industrias, Instituto Cubano de Recursos Minerales, Geología Cubana, No. 1:1–177.
- Bralower, T., and Iturralde-Vinent, M. 1997. Micropaleontological dating of the collision between the North American continental margin and the Greater Antilles Volcanic Arc in Western Cuba. *Palaaios*, 12:133–150. DOI: 10.2307/3515303.

- 308 Blanco-Bustamante, S. Fernández-Rodríguez, G., and Fluegeman, R. H. 1999. A note on the  
309 Biostratigraphy of Paleocene-Eocene Larger Foraminifera from Western Cuba.  
310 *Micropaleontology*, 45(2):19–26.
- 311 Cooper, G. A., 1955. New brachiopods from Cuba. *Journal of Paleontology*, 29(1):64–70.
- 312 Cooper, G. A., 1979. Tertiary and Cretaceous brachiopods from Cuba and the Caribbean.  
313 *Smithsonian Contributions to Paleobiology*, 37:1–56.
- 314 Cushman, J. A., and Bermúdez, P. J., 1948 (a). Some Paleocene foraminifera from the  
315 Madruga Formation of Cuba. *Contributions for the Cushman Laboratory for*  
316 *Foraminiferal Research*, 24:68–75.
- 317 Cushman, J.A., and Bermúdez, P. J., 1948 (b). Additional species of Paleocene foraminifera  
318 from the Madruga Formation of Cuba. *Contributions for the Cushman Laboratory for*  
319 *Foraminiferal Research*, 24:85–89.
- 320 Cushman, J. A., and Bermúdez, P. J. 1949. Some Cuban species of *Globorotalia*.  
321 *Contributions for the Cushman Laboratory for Foraminiferal Research*, 25:26–45.
- 322 Dall, W. H. 1900. Contributions to the Tertiary fauna of Florida with special reference to  
323 Silex Beds of Tampa and the Pliocene beds of the Caloosahatchee River. Part V.  
324 Teleodermacea: *Solen* to *Diplodonta*. *Transactions of the Wagner Free Institute of*  
325 *Science*, 3:949–1218.
- 326 De Golyer, E. 1918. The geology of Cuban petroleum deposits. *American Association of*  
327 *Petroleum Geologists Bulletin*, 2:133–167.
- 328 Fluegeman R. H., and Aubry, M. P. 1999. Lower Paleogene biostratigraphy of Cuba.  
329 *Micropaleontology*, 45(2):1–91.
- 330 Franco-Álvarez, G. L., Acevedo-González, M., Álvarez-Sánchez, H., Artibe Peñeñori, C.,  
331 Barriento-Duarte, A., Blanco-Bustamante, S., Cabrera, M., Cabrera, R., Carassou  
332 Agragan, G., Cobiella-Reguera, J. L., Coutin Lambert, R., De Albear, J. F., De

333 Huelbes Alonso, J., De la Torre y Callejas, A., Delgado Damas, R., Díaz de  
334 Villalvilla, L., Diaz-Otero, C., Dilla Alfonso, M., Echevarría-Hernández, B.,  
335 Fernández-Carmona, J., Fernández-Rodríguez, G., Flores-García, R., Florez-Abín, E.,  
336 Fonseca, E., Furrazola-Bermúdez, G., García-Delgado, D., Gil-González, S., González  
337 García, R.A., Gutiérrez-Domech, R., Linares-Cala, E., Milián García, E., Millán-  
338 Trujillo, G., Moncada Ferrera, M., Montero Zamora, L., Orbera, L., Ortega-Sastriques,  
339 F., Peñalver-Hernández, L. L., Perera, C., Pérez Arias, J. R., Pérez Lazo, J., Pérez  
340 Rodríguez, E., Pifieiro Pérez, E., Recio Herrera, A. M., Sánchez-Arango, J. R.,  
341 Saunders Pérez, E., Segura-Soto, R., Triff-Oquendo, J., Zuazo Alonso, A.,  
342 Pszczółkowski, A., Brezsnýánszky, K., Slavov, I., and Myczyński, R., 1992. *Léxico*  
343 *Estratigráfico de Cuba*. Centro de Nacional de Información Geológica, La Habana, 1-  
344 658.

345 Furrazola-Bermúdez, G., Judoley, C. M., Mijailovskaya, M. S., Mirolubov, Y. S.,  
346 Novojatsky, I. P., Nuñez Jiménez, A., and Solsona, J. B. 1964. *Geología de Cuba*.  
347 Editorial Nacional de Cuba, La Habana.

348 Garvie, C. L. 2013. Studies on the molluscan paleomacrobiofauna of the Texas Paleogene.  
349 *Bulletins of American Paleontology*, 384-386:1–222.

350 Keen, A. M. 1980. The pelecypod family Cardiidae: a taxonomic summary. *Tulane Studies in*  
351 *Geology and Paleontology*, 16:1-40.

352 Kier, P. 1984. Fossil spatangoid echinoids of Cuba. *Smithsonian Contributions to*  
353 *Paleobiology*, 55:1-336.

354 Iturralde-Vinent, M. 1995. Cuencas sedimentarias del Paleoceno-Eoceno de Cuba. *Boletín de*  
355 *la Sociedad Venezolana de Geología*, 20 (1-2):75–80.

356 Iturralde-Vinent, M., 2011. Geología de las rocas del Arco Volcánico del Paleógeno. En:  
357 Compendio de Geología de Cuba y del Caribe. Segunda Edición (published December  
358 2012), DVD-ROM. Editorial CITMATEL, ISBN: 9-789592-572863.

359 Iturralde-Vinent, M. 2015. Estratigrafía de las cuencas sinorogénicas del Campaniano tardío  
360 al Daniano desarrolladas sobre rocas de arco volcánico y retroarco en Cuba. *Anuario*  
361 *de la Sociedad Cubana de Geología*, No. 2:27–50.

362 Iturralde-Vinent, M., 2011. Cuencas sinorogénicas del Campaniano tardío al Eoceno Superior,  
363 desarrolladas sobre rocas del arco volcánico y máfico-ultramáficas. En: Compendio de  
364 Geología de Cuba y del Caribe. Segunda Edición, DVD-Rom. Editorial CITMATEL,  
365 ISBN: 9-789592-572863. Premio Academia de Ciencias de Cuba 2011.

366 Iturralde-Vinent, M., García-Casco, A., Rojas-Agramonte, Y., Proenza-Fernández, J.A.,  
367 Murphy, J.B., and Stern, R.J., 2016. The geology of Cuba: A brief overview and  
368 synthesis. *GSA Today*, 26(10):4–10, DOI: 10.1130/GSATG296A.1.

369 Iturralde-Vinent, M., and MacPhee, R. D. E. 1999. Paleogeography of the Caribbean region,  
370 implications for Cenozoic biogeography. *Bulletin of American Museum Natural*  
371 *History*, (238):1–95.

372 Lamarck, J. B. 1809. *Philosophie Zoologique*. Musée d'Histoire Naturelle, Paris.

373 Lewis, J. W., 1932 (a). Geology of Cuba (with discussion by R. J. Metcalf). *American*  
374 *Association of Petroleum Geologists Bulletin*, 16(6):533–555.

375 Lewis, J. W., 1932 (b). Occurrence of oil in igneous rocks in Cuba. *American Association of*  
376 *Petroleum Geologists Bulletin*, 16(8): 809–818.

377 Linnaeus, C. 1758. *Systema Naturae*. Laurentii Salvii, Homiae.

378 Özcan, E., Mitchell, S. F., Less, G., Robinson, E., Bryan, J. R., Pignatti, J., and Yücel, A. O.  
379 2019. A revised suprageneric classification of American orthophragminids with  
380 emphasis on late Paleocene representatives from Jamaica and Alabama. *Journal of*

*Systematic Palaeontology* 17:1551-1579.

<https://doi.org/10.1080/14772019.2018.1539778>.

Palmer, K. V. and Brann, D. C. 1965. Catalogue of the Paleocene and Eocene Mollusca of the southern and eastern United States. Part 1. Pelecypoda, Amphineura, Peteropoda, Scaphopoda, and Cephalopoda. *Bulletins of American Paleontology* 48:1-471.

Palmer, D. K., 1934. Some large Foraminifera from Cuba. *Memorias de la Sociedad Cubana de Historia Natural "Felipe Poey"*, 8(4):235–269.

Palmer, R. H., 1932. Informe geológico del área de Madruga. Oficina Nacional de Recursos Minerales, Ministerio de Energía y Minas, La Habana (Inédito).

Palmer, R. H., 1938. Field guide to geological excursion in Cuba. Secretaría de Agricultura, Panfleto, 1–12.

Palmer, R. H., 1948. List of Palmer Cuban fossil localities. *Bulletins of American Paleontology*, 31(128):1–178.

Sánchez-Roig, M., 1949. *Paleontología Cubana I: Los Equinodermos Fósiles de Cuba*. Compañía Editora de Libros y Folletos, La Habana, 1:1–330.

Sachs, K. N. 1957. Restudy of some Cuban larger Foraminifera. *Contributions from the Cushman Foundation for Foraminiferal Research*, VIII (3):106–120.

Sessa, J. A., Bralower, T. J., Patzkowsky, M. E., Handley, J. C. and Ivany, L. C. 2012. Environmental and biological controls on the diversity and ecology of Late Cretaceous through early Paleogene marine ecosystems in the U.S. Gulf Coastal Plain. *Paleobiology* 38(2):218–239.

Schneider, J. 2002. Phylogeny of cardiid bivalves (cockles and giant clams): revision of the Cardiinae and the importance of fossils in explaining disjunct biogeographical distributions. *Zoological Journal of the Linnaean Society*, 136:321–369.



- Toulmin, L. D. 1977. Stratigraphic Distribution of Paleocene and Eocene Fossils in the Eastern Gulf Coast Region. *Geological Survey of Alabama, Monograph*, 13(1):1–602.
- Wright, A., Sweet, P. W. K., 1924. The Jurassic as a source of oil in western Cuba. *Bulletin of the American Association of Petroleum Geologists*, 8(4):516–519.
- Woodring, W. P. 1982. Geology and paleontology of Canal Zone and adjoining parts of Panama: Description of Tertiary mollusks (Pelecypods: Propeamussiidae to Cuspidariidae). *United States Geological Survey Professional Paper*, 306(F):541-759.

## CAPTIONS

### Figures

Figure 1: Collecting locality of the Madruga Formation, near the city of Madruga, Province of Mayabeque, Cuba. 1.1 Mayabeque province, 1.2 Madruga municipality, and 1.3 Madruga Formation type locality indicated by the red arrow near the railroad bridge. Historical photographs of the construction of the road under the railroad bridge, where the exposed outcrops of the Madruga Formation can be seen during construction (1.4) and after (1.5).

Figure 2: Geological map indicating the outcrops associated with the Madruga Formation at the collection locality discussed (marked with an asterisk \*). Modified from Nunez and Iturralde-Vinent (2016). Madruga Formation (md), Paleocene (e1-3), Nazareno Formation (nz) lower Eocene (e4-5), Peñalver Formation (pn) upper Cretaceous (Cenomanian-Campanian, k1-5), Via Blanca Formation (vb), upper Cretaceous (Campanian-Maastrichtian, k5-6), Güines Formation (gn), lower Miocene (n1-2), and Cojimar Formation (cjr), middle Miocene (n3-4). UB indicates ophiolite outcrops.

Figure 3: *Schedocardia cf. hatchetigbeensis* (MPAL-1001) valve external mold in the matrix,

collected from the Madruga Formation.

Figure 4: Details of the *Schedocardia cf. hatchetigbeensis* (MPAL-1001). Note the ovoid foramen on the valve, and the smaller foramina in the space between the ribs, suggesting alternating rows of spines.

Figure 5. *Schedocardia hatchetigbeensis* for comparison. Specimen courtesy of Alabama Geological Survey.

Figure 6: *Acanthocardia* sp. specimen (MPAL-1002) in the matrix, collected from the indicated outcrop of the Madruga Formation.

Figure 7: Historical photograph of the road under the railroad bridge during construction in 1928.

Figure 8: Photo showing part of the road-cut and the apparent effects of the construction and use of explosives on the stratigraphy.

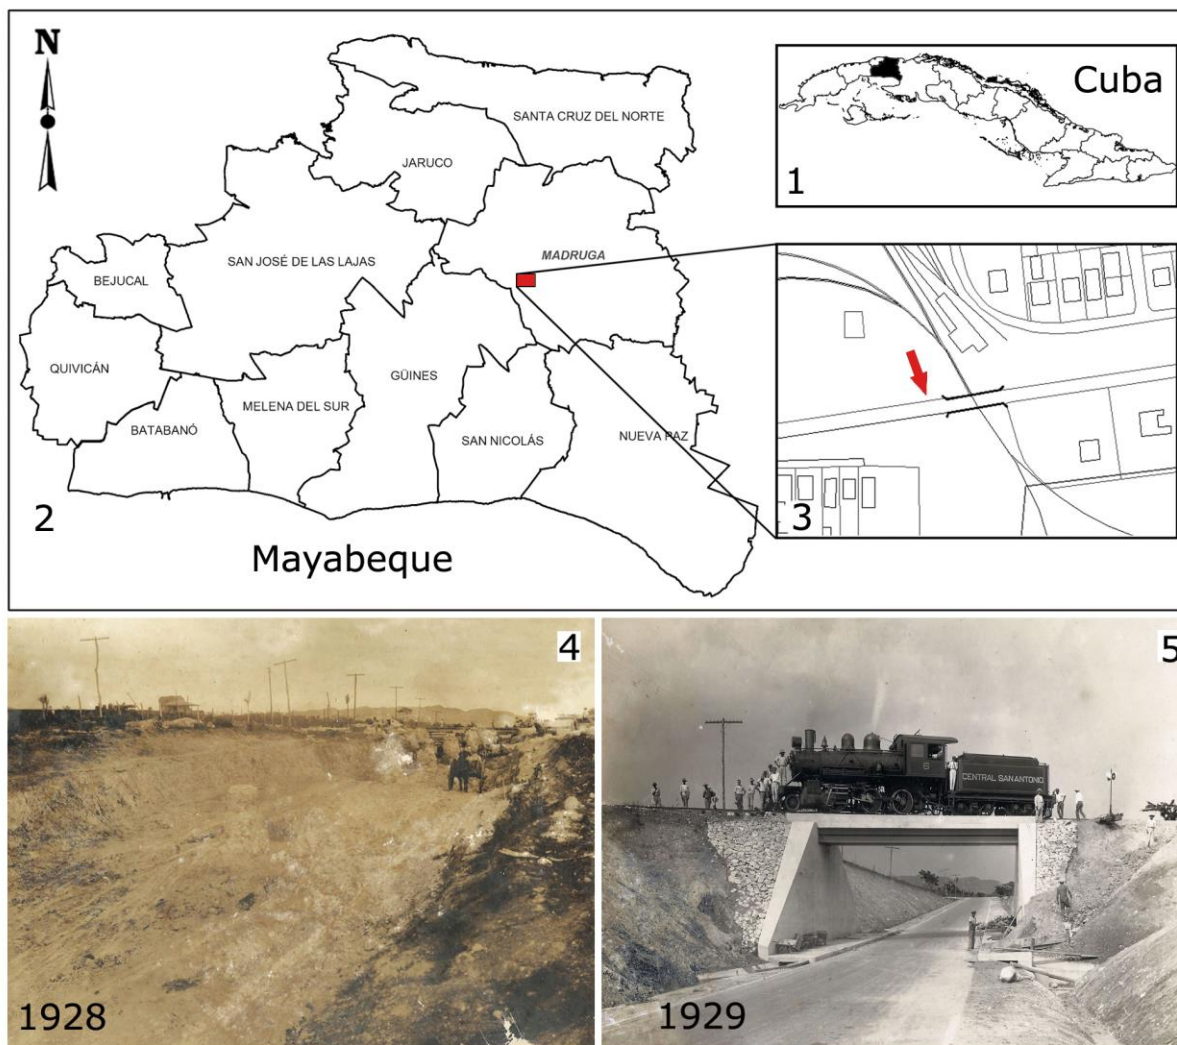

Figure 1.

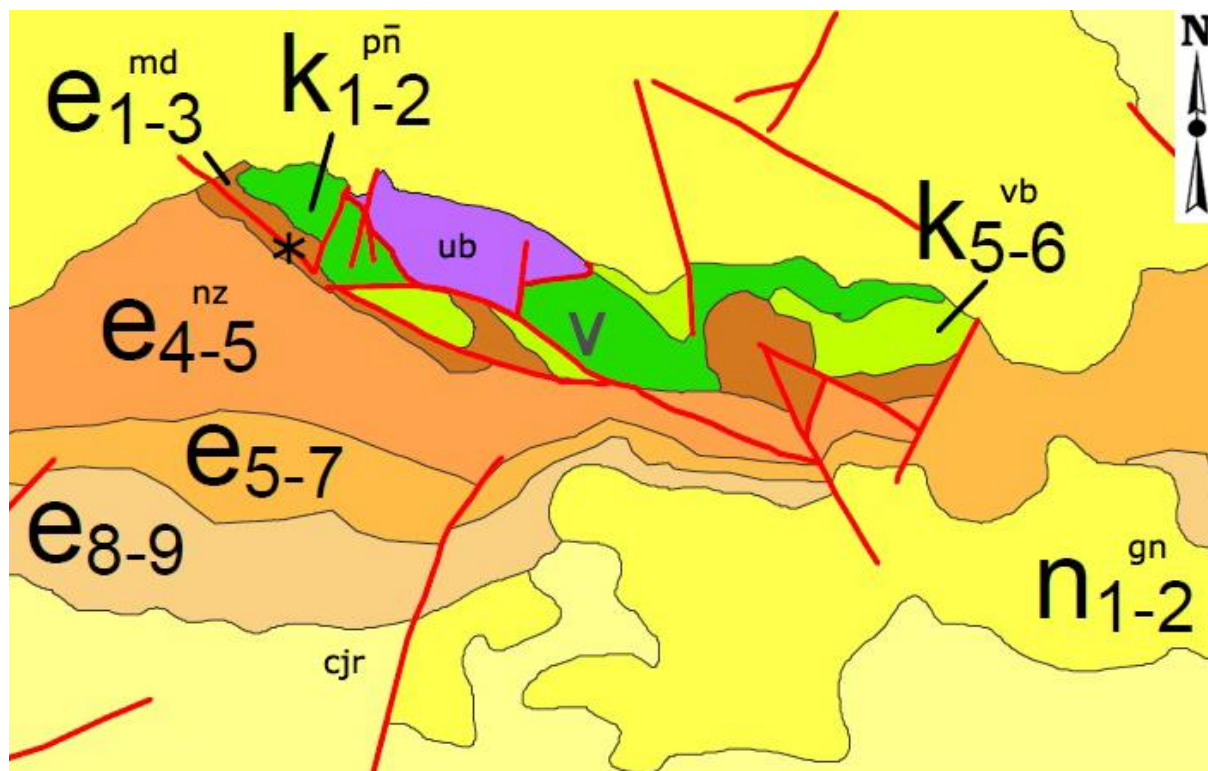

Figure 2.

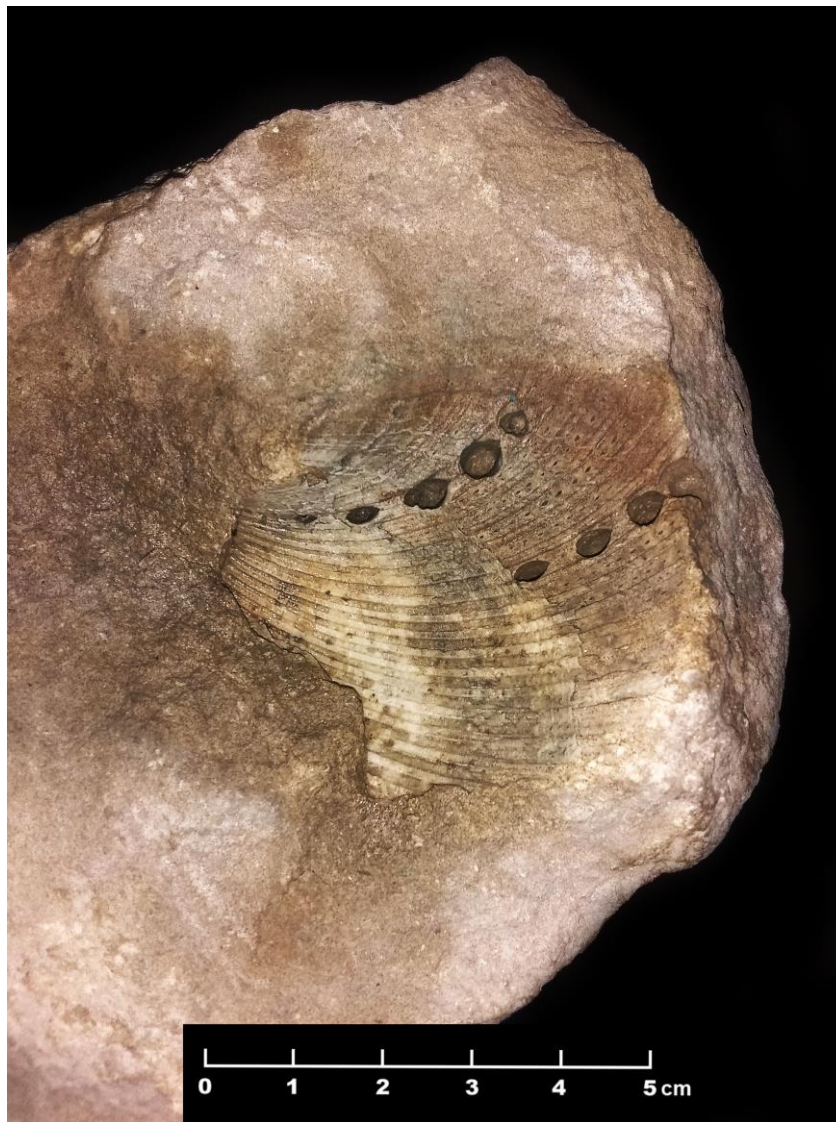

459

460 Figure 3.



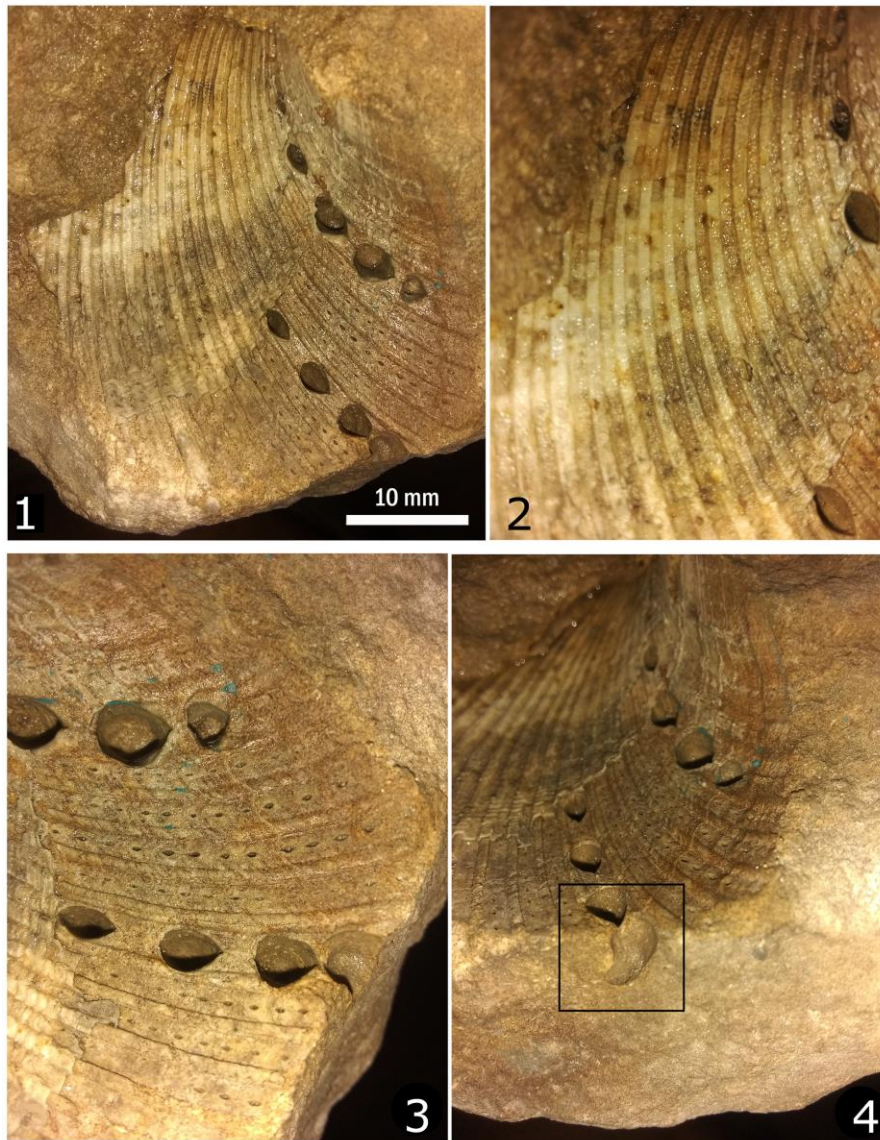

Figure 4.

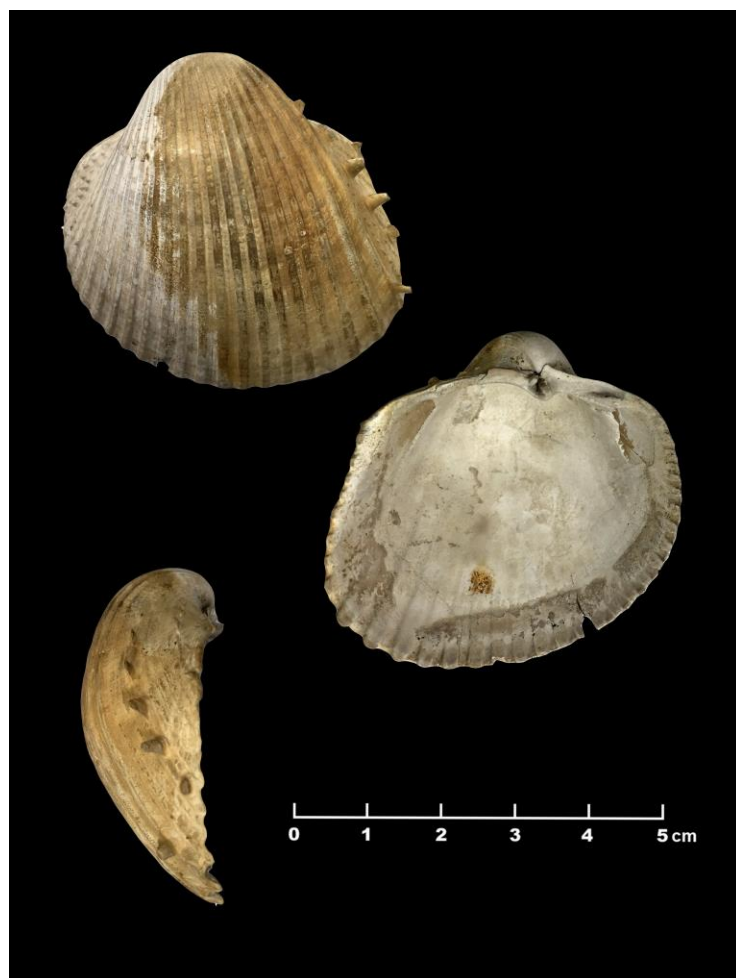

463

464 Figure 5.

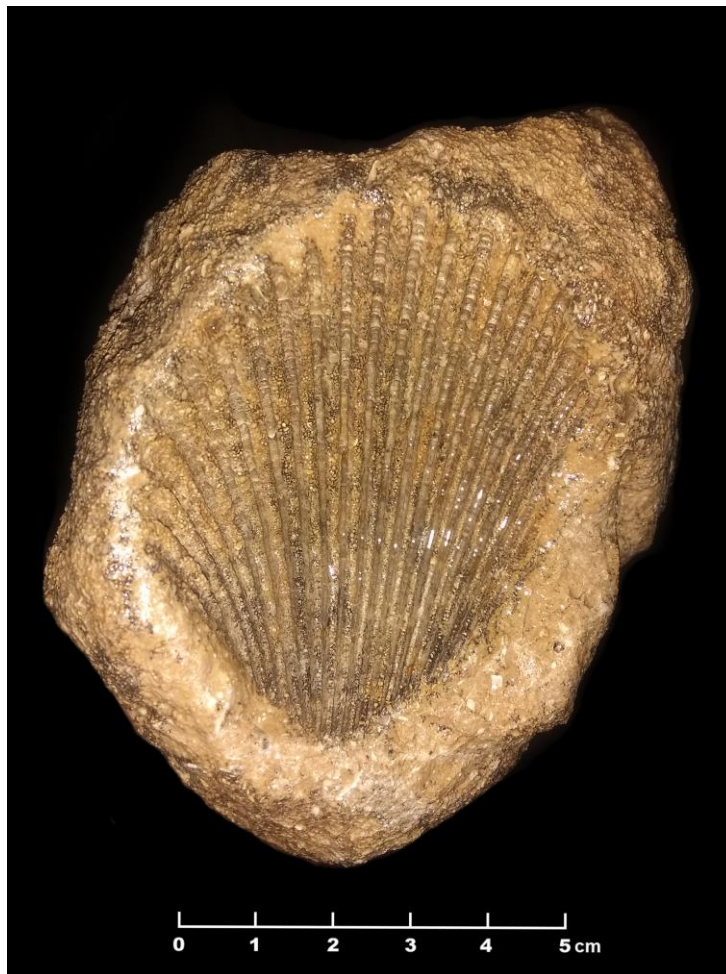

465

466 Figure 6.



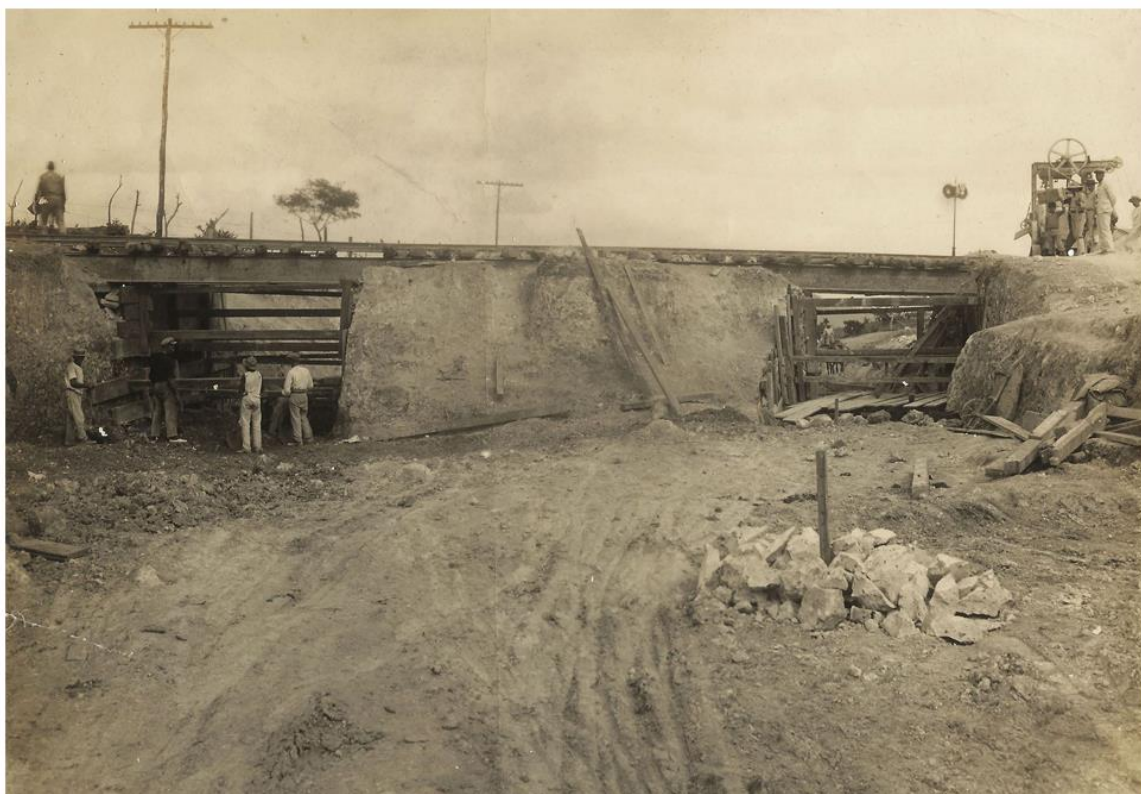

Figure 7.

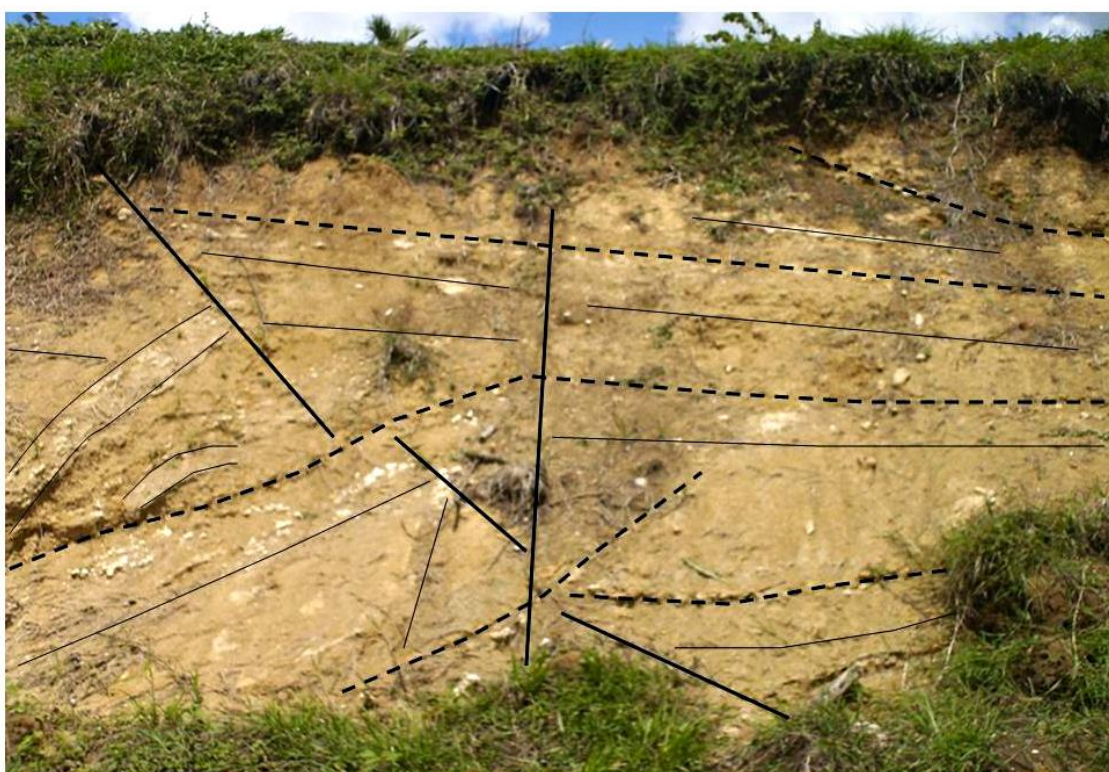

Figure 8.
