1 First report of the Eocene bivalve *Schedocardia* (Mollusca, Cardiidae) from Cuba

2

3 JOHANSET ORIHUELA<sup>1\*</sup>

4

5 <sup>1</sup> Department of Earth and Environment (Geosciences), Florida International University,

6 Miami, Florida 33199, USA, Email: [Jorih003@fiu.edu](mailto:Jorih003@fiu.edu) \* corresponding author

7

8 YASMANI CEBALLOS IZQUIERDO<sup>2</sup>

9

10 <sup>2</sup> Instituto de Geofísica y Astronomía, calle 212 No.2906 entre 29 y 31, La Coronela, La Lisa,

11 La Habana, Cuba, Email: [yasmaniceballos@gmail.com](mailto:yasmaniceballos@gmail.com)

12

13 ROGER W. PORTELL<sup>3</sup>

14

15 <sup>3</sup> Florida Museum of Natural History, 1659 Museum Road, University of Florida, Gainesville,

16 Florida 32611, USA, Email: [portell@flmnh.ufl.edu](mailto:portell@flmnh.ufl.edu)

17

18

19

20

21

22

23

24

25

26

27

28

29

30

31

32

33

34 ABSTRACT

35 Herein we provide the first report of the rare cardiid bivalve *Schedocardia* from Cuba. The single,  
36 partial, valve external mold was derived from the Madruga Formation which is characterized by a  
37 richly diverse marine fauna including echinoderms, brachiopods, benthic and planktonic  
38 foraminiferans, but from which bivalves were not previously reported. The unit is considered late  
39 Paleocene in age (Thanetian), but the presence of *Schedocardia* supports a possible age extension of  
40 the formation into the early Eocene (Ypresian). Moreover, we provide a reconsideration of the  
41 historical factors that affected the accepted type locality of the outcrop, which allows for an alternative  
42 interpretation of the shallow water fauna found therein.

43

44 Keywords: Mollusca; Cardiidae; Fossils; Eocene; Madruga Formation; Cuba

45

46 RESUMEN

47 Se reporta por primera vez el género bivalvo *Schedocardia* de la Formación Madruga, para el registro  
48 fósil de Cuba. De esta formación se ha reportado una rica fauna de invertebrados incluyendo  
49 equinodermos, braquiópodos y, especialmente de foraminíferos, pero no moluscos bivalvos. Se ha  
50 considerado que la Formación Madruga se depositó durante el Paleoceno tardío (Thanetiano), no  
51 obstante, la presencia de *Schedocardia* apoya la extensión de edad de la formación hasta el Eoceno  
52 temprano (Ypresiano). La consideración de factores antropogénicos que han afectado la localidad tipo  
53 de la formación nos permite ahora una interpretación alternativa del depósito y el ambiente de  
54 deposición.

55

56 Palabras clave: Molusco; Cardiido; Fósil; Eoceno; Madruga; Cuba

57

58

59

60

61 INTRODUCTION

62

63 The Paleocene of Cuba is represented in localized outcrops throughout the island, but the  
64 best-known outcrops are perhaps those near the town of Madruga, in central-eastern  
65 Mayabeque Province, where a complex of ophiolites, Cretaceous volcanic rocks, and latest  
66 Cretaceous, Paleogene and Neogene age sedimentary formations crop out (Furrazola-  
67 Bermúdez et al., 1964; Albear et al., 1985).

68 This region has been the subject of paleontological investigations since the early-  
69 middle 20<sup>th</sup> century, as part of oil and mineral prospecting by North American companies (De  
70 Golyer, 1918; Lewis, 1932a, b; Palmer, 1932; Wright and Sweet, 1924). Based on field trips  
71 made between 1929 and 1946 around Cuba, Palmer (1948) compiled a list of fossil-bearing  
72 localities, including more than 70 sites for the town of Madruga. In his publication, Palmer  
73 mentioned a locality previously identified by Lewis (1932a) as “*Cut under railroad bridge*  
74 *two kilometers west of Madruga at Central San Antonio*” and cataloged it as a notable locality  
75 (Loc. 757 in Palmer, 1948). Since Lewis (1932a) had not selected a holostatotype (type  
76 section) nor did he record its faunal content, Bermúdez (1950) erected the roadcut under the  
77 railroad bridge as the type locality for the Madruga Formation (Loc. Bermúdez Sta. 76b) and  
78 assigned it a Paleocene age.

79 This locality was originally described as “Madruga marls” by Lewis (1932a), who  
80 erroneously considered it of Late Cretaceous age. Its fossil fauna was reported later by Palmer  
81 (1934), Palmer (1932, 1948), Cushman and Bermúdez (1948a, b, 1949), Bermúdez (1938,  
82 1950), Cooper (1955, 1979), and Kier (1984). They had found mostly Cretaceous and  
83 Paleocene large foraminifers, but also assemblages consisting of small benthic and planktonic  
84 species including several index taxa (Palmer, 1934; Cushman and Bermúdez, 1948a, b, 1949;  
85 Bermúdez, 1950; Furrazola-Bermúdez et al., 1964; Lexicon, 2013). Interestingly,

86 brachiopods, scaphopods, and echinoid fragments were also reported. The brachiopods  
87 collected by Palmer, deposited in the U.S. National Museum, were later described and figured  
88 by Cooper (1955, 1979). Although these works provide a detailed account of the foraminifer  
89 faunule from the Madruga outcrop, bivalves had not been reported, and the echinoids and  
90 scaphopods still need investigation.

91         Recent fieldwork at this locality yielded several interesting, well-preserved fossil  
92 bivalve molds, representing a new addition to the fauna of the Madruga Formation undetected  
93 in over 80 years of collecting history at the site. Furthermore, our new observations contribute  
94 to the reinterpretation of the age and environment of deposition of the Madruga Formation.

95

## 96 MATERIALS AND METHODS

97

### 98 **Locality**

99

100         The Madruga Formation type section and collecting site of the bivalves herein  
101 reported is located at a highway cut near the Boris Luis Santa Coloma Sugar Plantation,  
102 outskirts of the town of Madruga, Mayabeque Province: GPS coordinates Lat. 22.906787°,  
103 Long. -81.872793°, datum WGS 84, altitude 159 m above modern sea level (taken from  
104 Google Earth). This is the same location, below the railroad bridge at the Carretera Central  
105 west of Madruga town, reported by Palmer (1948) as Loc. 757, and Loc. Sta. 76b in  
106 Bermúdez (1950). This section is the current lectostratotype of the Madruga Formation  
107 (Albear et al., 1985; Lexicon, 2013). The outcrop section discussed is ~4 m above the  
108 highway level, on each side. The bivalves herein were collected at a +1 m and +2.5 m (Fig.

109 1). This is nearby the original localities visited by Palmer and Bermúdez, but the exact  
110 locality of their collecting stations is unknown because they did not indicate them.

111

## 112 **Geological setting: Lithology and Deposition environment**

113

114 The Madruga section has been described as brown or reddish-brown calcareous well-  
115 stratified, cemented, greywacke sandstones, sandy-shales, and shales with some conglomerate  
116 intercalations. Clastic material is derived from older Cretaceous volcanic-sedimentary rocks,  
117 which in the conglomerates can reach from 30 to 40 cm up to 1 to 2 m in diameter.

118 Radiolarian sandstones have been reported (Cushman and Bermúdez, 1948a:68), but the  
119 origin of the silica (biogenic or volcanic) is unknown. The age of the unit was originally  
120 considered Late Cretaceous by Lewis (1932a:539, 1932b) but later defined as late Paleocene  
121 based on several index Foraminifera (Bermúdez, 1950, 1961; Furrázola-Bermúdez et al.,  
122 1964; Iturralde-Vinent, 2011).

123         Stratigraphically, the Madruga Formation lies concordant over the Mercedes  
124 Formation and discordant over the Peñalver (Late Cretaceous/early Paleocene) and Via  
125 Blanca Formations (Late Cretaceous) (Fig. 2). It is covered concordantly by the Capdevilla  
126 Formation (early Eocene) and discordantly by the Cojimar Formation (early-middle Miocene)  
127 and Nazareno Formation (late middle Eocene – late Eocene). The Cretaceous rocks ( $K_2^{cp-m?}$ )  
128 can be confused with the overlying Paleocene layers (Albear et al., 1985; Franco, 1992;  
129 Lexicon, 2013). At the type locality, these contacts with other formations are not exposed  
130 within the outcrop but are exposed at nearby locations. Fossil specimens are sparse and rare  
131 throughout the outcrop.

132           The environment of deposition has been interpreted as a marine synorogenic  
133 piggyback basin of medium to deep depth (bathyal), formed under unstable tectonic  
134 environment, transportation, and turbidity currents (Bralower and Iturralde-Vinent, 1997;  
135 Iturralde-Vinent and MacPhee, 1999; Iturralde-Vinent et al., 2016). The Apollo and  
136 Capdevilla Formations are considered lateral facies representing shallower marine  
137 environments, whereas the Nazareno Formation constitutes a deeper, more turbid  
138 environment (Albear and Iturralde-Vinent, 1985; Fluegeman, 1999). The Cretaceous volcanic  
139 arc rocks and the localized ophiolite likely represent a mélangé complex (flyschoid,  
140 containing serpentinite and gabbro) exposure in the region. These were likely exposed during  
141 western Cuba's major overthrust events of the Eocene (Iturralde-Vinent, 1996, 2011, 2015).

142

### 143 **Abbreviations**

144 *Institutional*— Specimen repository: Paleontology collection of the Madruga Museum  
145 (MPAL). LBF-large benthic foraminifera; PKF, planktonic foraminifera; SBF, small benthic  
146 Foraminifera.

147

## 148 **RESULTS**

149

### 150 **Systematic Paleontology**

151 Class: Bivalvia Linnaeus, 1758

152 Order: Cardiida Ferussac, 1822

153 Family: Cardiidae Lamarck, 1809

154 *Cardium* Group (sensu Schneider, 2002)

155 Genus: *Schedocardia* Dall 1900

156 *Schedocardia* cf. *hatchetigbeensis* (Aldrich, 1886)

157

158 **Specimens-** MPAL-1001, deposited at the paleontology collection of the Museum of  
159 Madrugá city. Collected by Yasmani Ceballos Izquierdo on June 2017, at 3-4 m west of the  
160 railroad bridge, on the north margin of the roadcut (Figs. 1-2).

161 **Description-** The fossil is an incomplete external mold in a calcareous matrix. The external  
162 mold is obliquely quadrate, elliptic-ovoid or schediform in shape (D in Schneider, 2002);  
163 radial ribs are narrow and nearly symmetrical throughout. There are small-simple foramina on  
164 the interstices between the radial ribs, valve margins crenulated. The interstices between  
165 radial ribs are wider than the width of the rib, wider spaced towards valve margin (Fig. 4).  
166 External ribs strongly expressed, but not alternating (i.e., wide to narrow) on a central slope.  
167 There are >19 ribs present on our specimen, but the exact number is unknown due to  
168 incompleteness. The spines or their foramina are more pronounced in the lower valve  
169 margins, in the near-symmetrical organization. Only the upper part of the valve external mold  
170 is visible. No spines or nobs present. Flanking ribs closely packed together. Cardinals, muscle  
171 scars, or hinge not visible (Fig. 4). The umbo is generally incomplete, but likely opisthogyral  
172 and wide. Marked, ovoid-shaped and incised foramina occur almost symmetrically along the  
173 curved-space between the valve ribs (Fig. 4). In cross-section, these either extend straight  
174 down or curved at the deepest tip. They may be alternating spines.

175 A smaller cardiid specimen is embedded in the same sample opposite this cast (not illustrated  
176 here).

177

178

179

## DISCUSSION

180

181 **Identification**

182 The specimen (MPAL-1001) is comparable to *Schedocardia waiparana* Freneix and Grant-  
183 Mackie 1978, *Schedocardia juncea* (Olsson 1930), and *Schedocardia gatunense* (Dall 1900),  
184 in their elliptic-ovate shape of the valve and higher, less oblique shell anteriorly (Figs. 3-5).  
185 However, it differs from these three species in having prominent ribs near the umbo, many  
186 more costae, interstices that are flat but wide, not narrow, and ribs that do not bear beads (as  
187 in *S. gatunense*). In that sense, our specimen agrees closely with *Schedocardia*  
188 *hatchetigbeensis* (Aldrich 1886) in having narrower interstices, lacking rib beads, and having  
189 low spines inside these spaces. Since our specimen is incomplete, we tentatively refer it here  
190 to *S. cf. hatchetigbeensis* until further specimens are available (Fig. 5).

191  
192 In addition to the *Schedocardia*, another cardiid bivalve, *Acanthocardia* (MPAL-1002), was  
193 discovered in the same deposit (Fig. 6). This specimen has an obliquely quadrate shell, with  
194 21 visible ribs, crenulate valve margins, and spinose/nodose ribs. Probable double ribs can be  
195 seen on the imbricated valve side. Although the specimen is incomplete, it resembles in  
196 overall morphology *Acanthocardia tuberculata* (Linnaeus 1758) and *Acanthocardia*  
197 *mucronata* (Linnaeus 1758). However, the specimen is too incomplete to assign to species.

198

## 199 **Chronology**

200 The Madruga Formation has been formerly assigned to the late Paleocene (upper) by the  
201 researchers of the Cuban Geological Lexicon and others (Sánchez-Roig, 1949; Sachs, 1957;  
202 Bermúdez, 1950, 1961; Furrázola-Bermúdez et al., 1964; Lexicon, 2013) based on the  
203 presence of several index taxa, such as the planktic foram *Morozovella velascoensis*  
204 (Cushman 1925), index of PKF zone P5, and *Pseudophragmina* (= *Athecocyclina*) *stephensoni*  
205 (Vaughan 1929), a large benthic foraminifer of carbonate banks (Özcan et al., 2019). More  
206 recently, researchers have extended the age of the formation to the early Eocene (Ypresian)



207 due to the presence of the LBF *Euconuloides wellsi* (Cole and Bermúdez, 1944), which is  
208 absent in Paleogene assemblages (Blanco-Bustamante et al., 1999).  
209 The genus *Schedocardia* appears in the fossil record in the late Paleocene (Keen, 1980;  
210 Schneider, 2002), but apparently did not have its acme until the Eocene. *Schedocardia*  
211 *hatchetigbeensis* has been reported from the early Eocene (Ypresian) of Alabama and Texas,  
212 USA (Toulmin, 1977; Sessa et al., 2012). Other *Schedocardia* species, such as *S. juncea* and  
213 *S. gatunense* are reported from the late Eocene of Panama, Venezuela, Colombia, and Peru  
214 (Woodring, 1982). Therefore, the genus is generally considered to be an Eocene indicator  
215 (Woodring, 1982:542). The occurrence of *Schedocardia* in the Madruga Formation seems to  
216 support the extension of the Cuban formation at least to the early Eocene.  
217 Cushman and Bermúdez (1948a, b) correlated the Madruga Formation with late Paleocene  
218 formations from Alabama and Texas, so it is not so surprising that *S. cf. hatchetigbeensis*  
219 appears here. These North American formations are now considered early Eocene (Toulmin,  
220 1977; Sessa et al., 2012).

221

## 222 **Environment**

223 *Schedocardia* and *Acanthocardia* are considered facultative mobile infaunal (benthic)  
224 suspension feeders (Clarkson, 1986). Their presence, along with multiple large benthic forams  
225 (LBF's), echinoids, and brachiopods suggests that after the late Paleocene, during the early  
226 Eocene, the area of deposition became a shallower marine environment, like the lateral facies  
227 Apollo and Capdevilla Formations, or were redeposited from shallower environments into  
228 deeper by more turbid environments (Blanco-Bustamante et al., 1999). The presence of the  
229 conglomerates and polymictic elements may suggest closer proximity to a deltaic  
230 environment. Moreover, these suggests that at least some of the fauna reported for the  
231 Madruga Formation may have originated in shallower waters of a nearby shelf-foreereef

232 environment, transported or reworked by currents or other agents into deeper depositional  
233 environments interpreted in the current literature (Albear et al., 1985; Franco et al., 1992;  
234 Iturralde-Vinent, 2011; Lexicon, 2013). This interpretation agrees with the overall trend in the  
235 orogenic activity of the Cuban terrain during the early-middle Eocene (Bralower and  
236 Iturralde-Vinent, 1997; Iturralde-Vinent and MacPhee, 1999; Iturralde, 1996, 2011; Iturralde-  
237 Vinent et al., 2016). However, much more evidence is needed to support these observations  
238 and hypotheses.

239

#### 240 **Limitations and final considerations**

241 Our observations call attention to several limitations that must be considered for our current  
242 interpretation of this outcrop and its fauna. The construction of the highway highly disturbed  
243 the area of the outcrop. At the time of the Palmer and Bermúdez visits, those outcrops were  
244 well-exposed due to the recent highway construction but are currently severely deteriorated or  
245 disturbed by urbanization. Windows into the fossil-bearing strata are rare due to vegetation  
246 and soil cover (YCI unp. observations). Former investigators, however, did not take into  
247 consideration the anthropogenic alterations inflicted on the local stratigraphy by the  
248 construction of the roads (Figs. 1, 6). These modifications seem to have severely altered or  
249 mixed the bedding at our collecting locality (Fig. 7.2), and the horizontality of several beds at  
250 several locations. The use of dynamite and heavy machinery likely affected the local  
251 stratigraphy and occurrence of its fossil fauna, which up to now has not been considered in  
252 any of the published accounts of the outcrop since the 1920's (Fig. 7).

253 Furthermore, the historic photographs taken during the construction of the highway and  
254 overpass show the presence of a more lithified outcrop-base than the more friable, marly,  
255 polymictic sandstones covered by soil and vegetation of today. It is possible that large  
256 boulders now present in the outcrop were positioned there then. All these factors, and the

257 presence of these hitherto unreported faunal components prompt a reassessment of the whole  
258 outcrop that could help clarify the stratigraphy, fauna, and age of the Madruga Formation and  
259 its formational history. Much more data is needed to test some of these initial observations  
260 and hypotheses. However, we are confident that such an investigation will reveal a far richer  
261 Madruga Formation than currently characterized.

262

263

## CONCLUSIONS

264

265 The Paleocene bivalve fauna of Cuba has been scantily investigated, although outcrops of  
266 marine sedimentary rocks of this age are widespread throughout the island. One of the  
267 foremost Paleocene Cuban geologic units is the Madruga Formation, which occurs near the  
268 town of Madruga, in eastern Mayabeque Province. This formation has produced diverse  
269 foraminifera, brachiopod, and echinoid faunas, but bivalves up to now have not been reported.  
270 Herein, we expand the chronologic and paleoenvironmental setting by recording the cardiid  
271 bivalve genus *Schedocardia*, which is the first report for the Cuban fossil record. Historical  
272 insight gleaned from photographs taken during the construction of the highway call attention  
273 to the high level of disturbance and anthropogenization which the outcrop has been subjected  
274 since the late 1920's and cautions as to the depositional and chronologic interpretation of the  
275 samples taken there since. Moreover, our observations call for a reassessment of the stratotype  
276 outcrop and the Madruga Formation.

277

278

## ACKNOWLEDGMENTS

279

280 We thank Manuel Iturralde-Vinent for his observations and comments that greatly improved  
281 earlier versions of the manuscript, Jan Johan ter Poorten for his aid in the identification of the  
282 Cuban *Schedocardia* specimen and Madruga city historian Carlos Miguel Suárez Sardiñas for

283 providing important historical insight, historical photographs, and aid during the fieldwork.

284 Furthermore, our manuscript was improved by comments and suggestions of Lazaro Viñola

285 López. Sandy Ebersole and Lynn Harrell kindly loaned the *S. hatchetigbeensis* valve

286 exhibited in Figure 5 and Sean Roberts assisted with specimen imaging.

287

288

## REFERENCES

289

290 Albear, J. F. and Iturralde-Vinent, et al. 1977. Memoria explicativa del mapa geológico escala

291 1:250 000 de las provincias de La Habana (unpublished). Fondo Geológico de Cuba,

292 Instituto de Geología y Paleontología de la Academia de Ciencias de Cuba, La

293 Habana, Cuba.

294 Albear, J. F., Iturralde-Vinent, M., Furrázola-Bermúdez, G., and Sánchez-Arango, J. R. 1985.

295 Contribución a la geología de las provincias de La Habana y Ciudad de la Habana.

296 Editorial Científico-Técnica, La Habana.

297 Aldrich, T. H. 1886. Preliminary report on the Tertiary fossils of Alabama and Mississippi.

298 *Bulletin of the Geological Survey of Alabama*, part I:15–60.

299 Bermúdez, P. J. 1938. Nueva especie de *Bulimina* del Cretácico Superior cubano. *Memorias*

300 *de la Sociedad Cubana de Historia Natural “Felipe Poey”*, 12(2):80–90.

301 Bermúdez, P. J. 1950. Contribución al estudio del Cenozoico cubano. *Memorias de la*

302 *Sociedad Cubana de Historia Natural “Felipe Poey”*, 19(3):204–375.

303 Bermúdez, P. J. 1961. *Las Formaciones Geológicas de Cuba*. Ministerio de Industrias,

304 Instituto Cubano de Recursos Minerales, Geología Cubana, No. 1:1–177.

305 Bralower, T., and Iturralde-Vinent, M. 1997. Micropaleontological dating of the collision

306 between the North American continental margin and the Greater Antilles Volcanic Arc

307 in Western Cuba. *Palaios*, 12:133–150. DOI: 10.2307/3515303.

- 308 Blanco-Bustamante, S. Fernández-Rodríguez, G., and Fluegeman, R. H. 1999. A note on the  
309 Biostratigraphy of Paleocene-Eocene Larger Foraminifera from Western Cuba.  
310 *Micropaleontology*, 45(2):19–26.
- 311 Cooper, G. A., 1955. New brachiopods from Cuba. *Journal of Paleontology*, 29(1):64–70.
- 312 Cooper, G. A., 1979. Tertiary and Cretaceous brachiopods from Cuba and the Caribbean.  
313 *Smithsonian Contributions to Paleobiology*, 37:1–56.
- 314 Cushman, J. A., and Bermúdez, P. J., 1948 (a). Some Paleocene foraminifera from the  
315 Madruga Formation of Cuba. *Contributions for the Cushman Laboratory for*  
316 *Foraminiferal Research*, 24:68–75.
- 317 Cushman, J.A., and Bermúdez, P. J., 1948 (b). Additional species of Paleocene foraminifera  
318 from the Madruga Formation of Cuba. *Contributions for the Cushman Laboratory for*  
319 *Foraminiferal Research*, 24:85–89.
- 320 Cushman, J. A., and Bermúdez, P. J. 1949. Some Cuban species of *Globorotalia*.  
321 *Contributions for the Cushman Laboratory for Foraminiferal Research*, 25:26-45.
- 322 Dall, W. H. 1900. Contributions to the Tertiary fauna of Florida with special reference to  
323 Silex Beds of Tampa and the Pliocene beds of the Caloosahatchee River. Part V.  
324 Teleodermacea: *Solen* to *Diplodonta*. *Transactions of the Wagner Free Institute of*  
325 *Science*, 3:949–1218.
- 326 De Golyer, E. 1918. The geology of Cuban petroleum deposits. *American Association of*  
327 *Petroleum Geologists Bulletin*, 2:133–167.
- 328 Fluegeman R. H., and Aubry, M. P. 1999. Lower Paleogene biostratigraphy of Cuba.  
329 *Micropaleontology*, 45(2):1–91.
- 330 Franco-Álvarez, G. L., Acevedo-González, M., Álvarez-Sánchez, H., Artime Peñeñori, C.,  
331 Barriento-Duarte, A., Blanco-Bustamante, S., Cabrera, M., Cabrera, R., Carassou  
332 Agragan, G., Cobiella-Reguera, J. L., Coutin Lambert, R., De Albear, J. F., De

- 333 Huelbes Alonso, J., De la Torre y Callejas, A., Delgado Damas, R., Díaz de  
334 Villalvilla, L., Diaz-Otero, C., Dilla Alfonso, M., Echevarría-Hernández, B.,  
335 Fernández-Carmona, J., Fernández-Rodríguez, G., Flores-García, R., Florez-Abín, E.,  
336 Fonseca, E., Furrázola-Bermúdez, G., García-Delgado, D., Gil-González, S., González  
337 García, R.A., Gutiérrez-Domech, R., Linares-Cala, E., Milián García, E., Millán-  
338 Trujillo, G., Moncada Ferrera, M., Montero Zamora, L., Orbera, L., Ortega-Sastriques,  
339 F., Peñalver-Hernández, L. L., Perera, C., Pérez Arias, J. R., Pérez Lazo, J., Pérez  
340 Rodríguez, E., Pifieiro Pérez, E., Recio Herrera, A. M., Sánchez-Arango, J. R.,  
341 Saunders Pérez, E., Segura-Soto, R., Triff-Oquendo, J., Zuazo Alonso, A.,  
342 Pszczółkowski, A., Brezsnýánszky, K., Slavov, I., and Myczyński, R., 1992. *Léxico*  
343 *Estratigráfico de Cuba*. Centro de Nacional de Información Geológica, La Habana, 1-  
344 658.
- 345 Furrázola-Bermúdez, G., Judoley, C. M., Mijailovskaya, M. S., Miroljubov, Y. S.,  
346 Novojatsky, I. P., Nuñez Jiménez, A., and Solsona, J. B. 1964. *Geología de Cuba*.  
347 Editorial Nacional de Cuba, La Habana.
- 348 Garvie, C. L. 2013. Studies on the molluscan paleomacrobiofauna of the Texas Paleogene.  
349 *Bulletins of American Paleontology*, 384-386:1–222.
- 350 Keen, A. M. 1980. The pelecypod family Cardiidae: a taxonomic summary. *Tulane Studies in*  
351 *Geology and Paleontology*, 16:1-40.
- 352 Kier, P. 1984. Fossil spatangoid echinoids of Cuba. *Smithsonian Contributions to*  
353 *Paleobiology*, 55:1-336.
- 354 Iturralde-Vinent, M. 1995. Cuencas sedimentarias del Paleoceno-Eoceno de Cuba. *Boletín de*  
355 *la Sociedad Venezolana de Geología*, 20 (1-2):75–80.

- 356 Iturralde-Vinent, M., 2011. Geología de las rocas del Arco Volcánico del Paleógeno. En:  
357 Compendio de Geología de Cuba y del Caribe. Segunda Edición (published December  
358 2012), DVD-ROM. Editorial CITMATEL, ISBN: 9-789592-572863.
- 359 Iturralde-Vinent, M. 2015. Estratigrafía de las cuencas sinorogénicas del Campaniano tardío  
360 al Daniano desarrolladas sobre rocas de arco volcánico y retroarco en Cuba. *Anuario*  
361 *de la Sociedad Cubana de Geología*, No. 2:27–50.
- 362 Iturralde-Vinent, M., 2011. Cuencas sinorogénicas del Campaniano tardío al Eoceno Superior,  
363 desarrolladas sobre rocas del arco volcánico y máfico-ultramáficas. En: Compendio de  
364 Geología de Cuba y del Caribe. Segunda Edición, DVD-Rom. Editorial CITMATEL,  
365 ISBN: 9-789592-572863. Premio Academia de Ciencias de Cuba 2011.
- 366 Iturralde-Vinent, M., García-Casco, A., Rojas-Agramonte, Y., Proenza-Fernández, J.A.,  
367 Murphy, J.B., and Stern, R.J., 2016. The geology of Cuba: A brief overview and  
368 synthesis. *GSA Today*, 26(10):4–10, DOI: 10.1130/GSATG296A.1.
- 369 Iturralde-Vinent, M., and MacPhee, R. D. E. 1999. Paleogeography of the Caribbean region,  
370 implications for Cenozoic biogeography. *Bulletin of American Museum Natural*  
371 *History*, (238):1–95.
- 372 Lamarck, J. B. 1809. *Philosophie Zoologique*. Musée d'Histoire Naturelle, Paris.
- 373 Lewis, J. W., 1932 (a). Geology of Cuba (with discussion by R. J. Metcalf). *American*  
374 *Association of Petroleum Geologists Bulletin*, 16(6):533–555.
- 375 Lewis, J. W., 1932 (b). Occurrence of oil in igneous rocks in Cuba. *American Association of*  
376 *Petroleum Geologists Bulletin*, 16(8): 809–818.
- 377 Linnaeus, C. 1758. *Systema Naturae*. Laurentii Salvii, Homiae.
- 378 Özcan, E., Mitchell, S. F., Less, G., Robinson, E., Bryan, J. R., Pignatti, J., and Yücel, A. O.  
379 2019. A revised suprageneric classification of American orthophragminids with  
380 emphasis on late Paleocene representatives from Jamaica and Alabama. *Journal of*

- 381           *Systematic Palaeontology* 17:1551-1579.
- 382           <https://doi.org/10.1080/14772019.2018.1539778>.
- 383 Palmer, K. V. and Brann, D. C. 1965. Catalogue of the Paleocene and Eocene Mollusca of the  
384 southern and eastern United States. Part 1. Pelecypoda, Amphineura, Peteropoda,  
385 Scaphopoda, and Cephalopoda. *Bulletins of American Paleontology* 48:1-471.
- 386 Palmer, D. K., 1934. Some large Foraminifera from Cuba. *Memorias de la Sociedad Cubana*  
387 *de Historia Natural "Felipe Poey"*, 8(4):235–269.
- 388 Palmer, R. H., 1932. Informe geológico del área de Madruga. Oficina Nacional de Recursos  
389 Minerales, Ministerio de Energía y Minas, La Habana (Inédito).
- 390 Palmer, R. H., 1938. Field guide to geological excursion in Cuba. Secretaría de Agricultura,  
391 Panfleto, 1–12.
- 392 Palmer, R. H., 1948. List of Palmer Cuban fossil localities. *Bulletins of American*  
393 *Paleontology*, 31(128):1–178.
- 394 Sánchez-Roig, M., 1949. *Paleontología Cubana I: Los Equinodermos Fósiles de Cuba*.  
395 Compañía Editora de Libros y Folletos, La Habana, 1:1–330.
- 396 Sachs, K. N. 1957. Restudy of some Cuban larger Foraminifera. *Contributions from the*  
397 *Cushman Foundation for Foraminiferal Research*, VIII (3):106–120.
- 398 Sessa, J. A., Bralower, T. J., Patzkowsky, M. E., Handley, J. C. and Ivany, L. C. 2012.  
399 Environmental and biological controls on the diversity and ecology of Late Cretaceous  
400 through early Paleogene marine ecosystems in the U.S. Gulf Coastal Plain.  
401 *Paleobiology* 38(2):218–239.
- 402 Schneider, J. 2002. Phylogeny of cardiid bivalves (cockles and giant clams): revision of the  
403 Cardiinae and the importance of fossils in explaining disjunct biogeographical  
404 distributions. *Zoological Journal of the Linnaean Society*, 136:321–369.



- 405 Toulmin, L. D. 1977. Stratigraphic Distribution of Paleocene and Eocene Fossils in the  
406 Eastern Gulf Coast Region. *Geological Survey of Alabama, Monograph*, 13(1):1–602.
- 407 Wright, A., Sweet, P. W. K., 1924. The Jurassic as a source of oil in western Cuba. *Bulletin of*  
408 *the American Association of Petroleum Geologists*, 8(4):516–519.
- 409 Woodring, W. P. 1982. Geology and paleontology of Canal Zone and adjoining parts of  
410 Panama: Description of Tertiary mollusks (Pelecypods: Propeamussiidae to  
411 Cuspidariidae). *United States Geological Survey Professional Paper*, 306(F):541-759.

412

### 413 CAPTIONS

#### 414 **Figures**

415 Figure 1: Collecting locality of the Madruga Formation, near the city of Madruga, Province of  
416 Mayabeque, Cuba. 1.1 Mayabeque province, 1.2 Madruga municipality, and 1.3 Madruga  
417 Formation type locality indicated by the red arrow near the railroad bridge. Historical  
418 photographs of the construction of the road under the railroad bridge, where the exposed  
419 outcrops of the Madruga Formation can be seen during construction (1.4) and after (1.5).

420

421 Figure 2: Geological map indicating the outcrops associated with the Madruga  
422 Formation at the collection locality discussed (marked with an asterisk \*). Modified from  
423 Nunez and Iturralde-Vinent (2016). Madruga Formation (md), Paleocene (e1-3),  
424 Nazareno Formation (nz) lower Eocene (e4-5), Peñalver Formation (pn) upper Cretaceous  
425 (Cenomanian-Campanian, k1-5), Via Blanca Formation (vb), upper Cretaceous (Campanian-  
426 Maastrichtian, k5-6), Güines Formation (gn), lower Miocene (n1-2), and Cojimar Formation  
427 (cjr), middle Miocene (n3-4). UB indicates ophiolite outcrops.

428

429 Figure 3: *Schedocardia cf. hatchetigbeensis* (MPAL-1001) valve external mold in the matrix,

430 collected from the Madruga Formation.

431

432 Figure 4: Details of the *Schedocardia cf. hatchetigbeensis* (MPAL-1001). Note the ovoid  
433 foramen on the valve, and the smaller foramina in the space between the ribs, suggesting  
434 alternating rows of spines.

435

436 Figure 5. *Schedocardia hatchetigbeensis* for comparison. Specimen courtesy of Alabama  
437 Geological Survey.

438

439 Figure 6: *Acanthocardia* sp. specimen (MPAL-1002) in the matrix, collected from the  
440 indicated outcrop of the Madruga Formation.

441

442 Figure 7: Historical photograph of the road under the railroad bridge during construction in  
443 1928.

444

445 Figure 8: Photo showing part of the road-cut and the apparent effects of the construction and  
446 use of explosives on the stratigraphy.

447

448

449

450

451

452

453

454

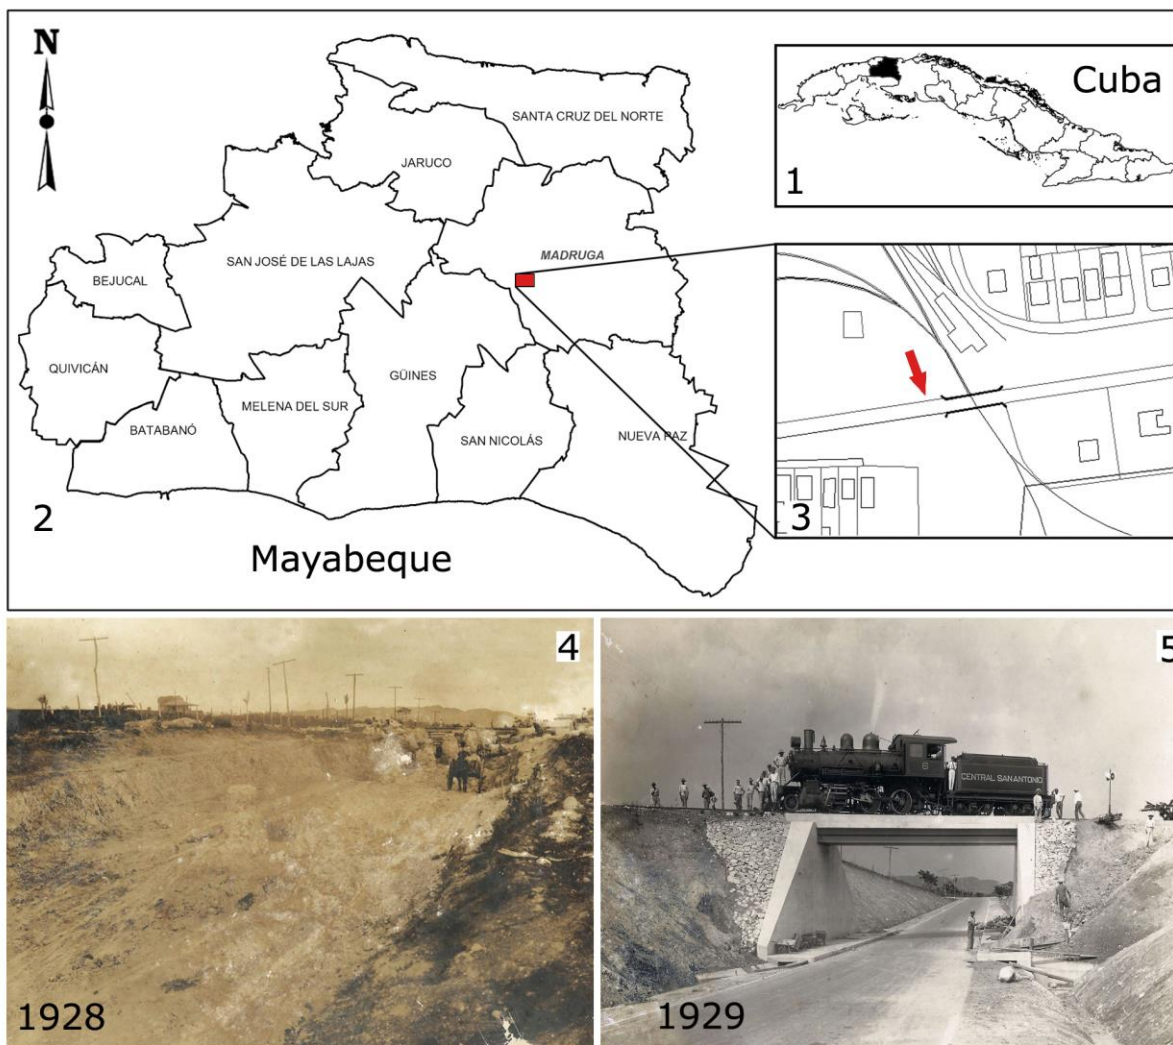

455

456 Figure 1.

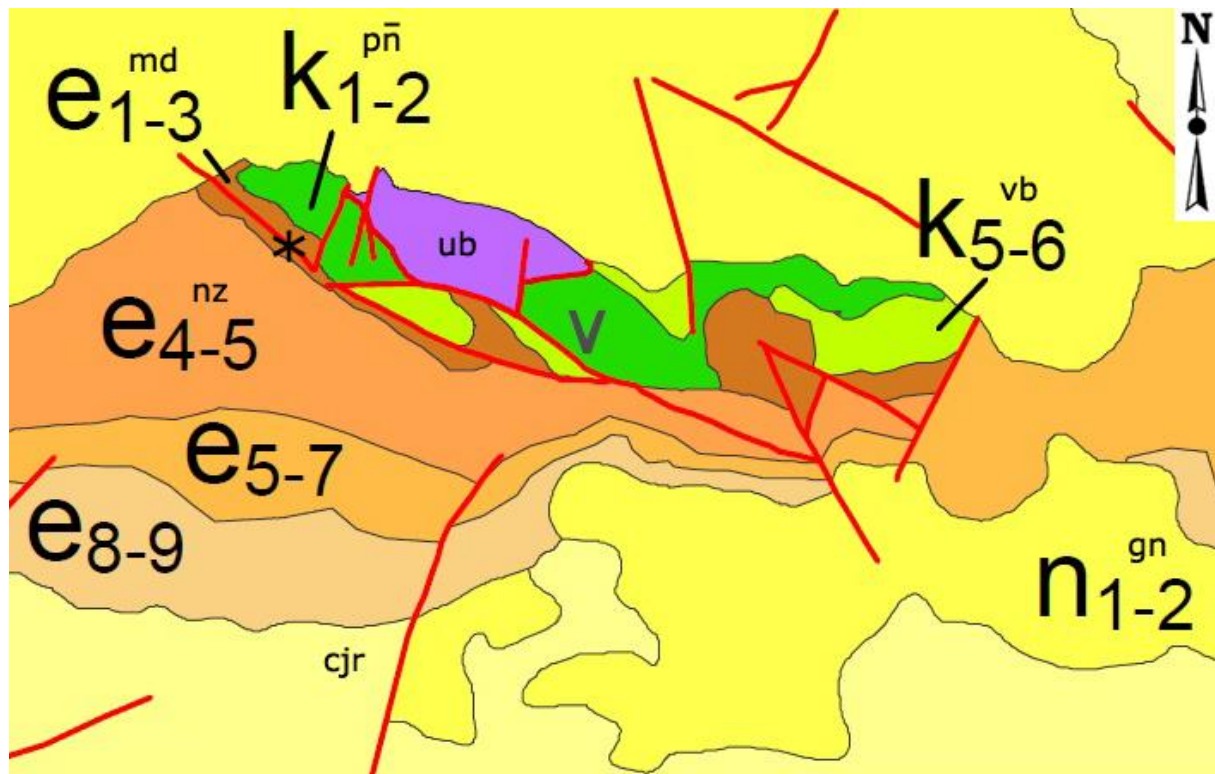

457

458 Figure 2.

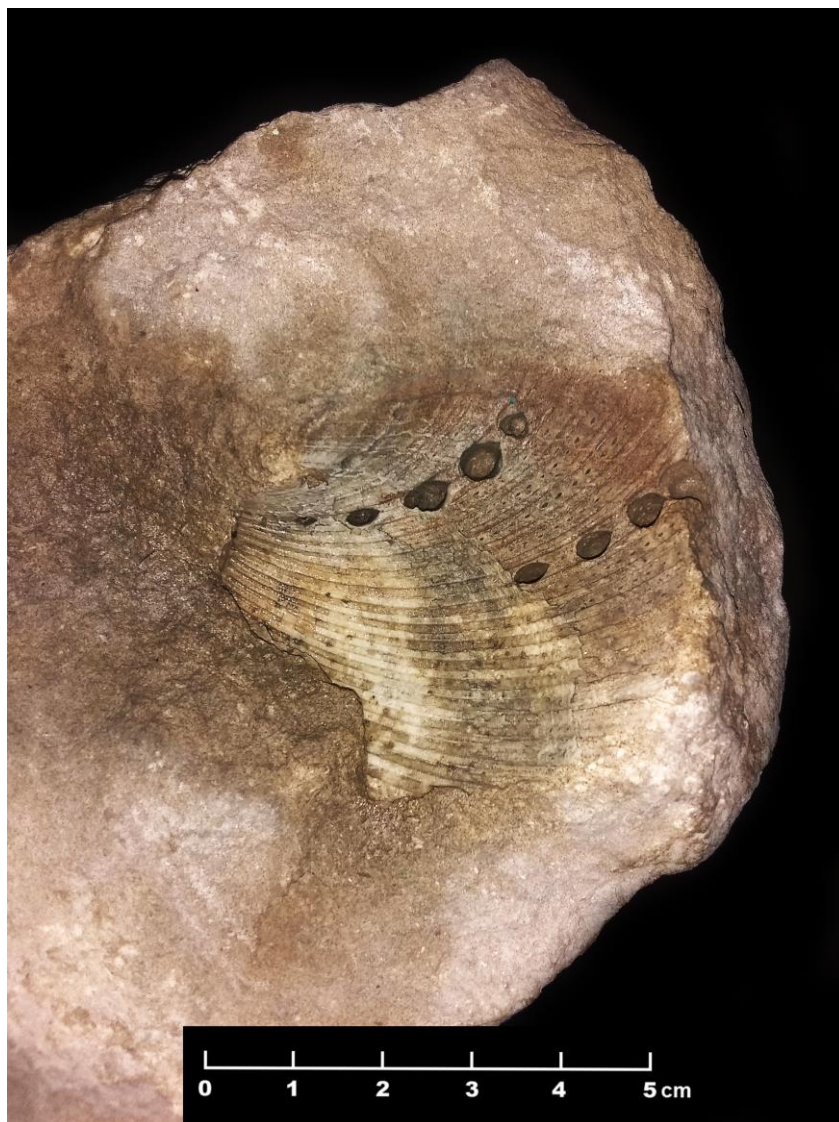

459

460 Figure 3.



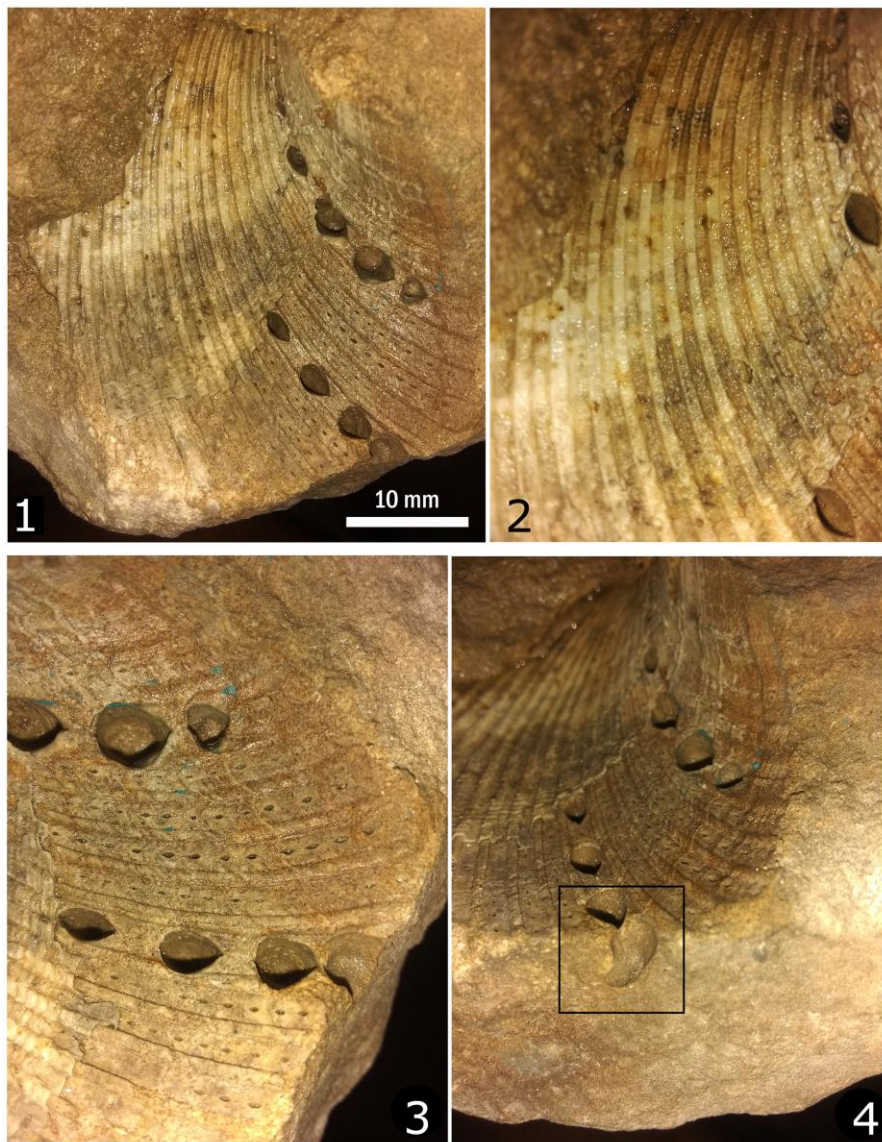

461

462 Figure 4.

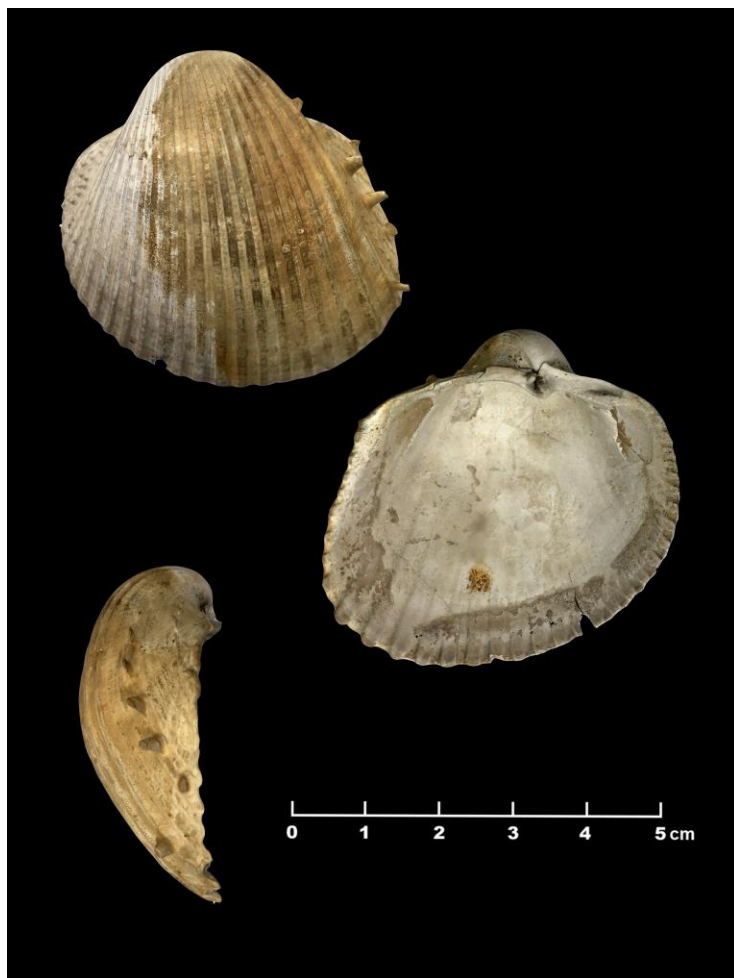

463

464 Figure 5.

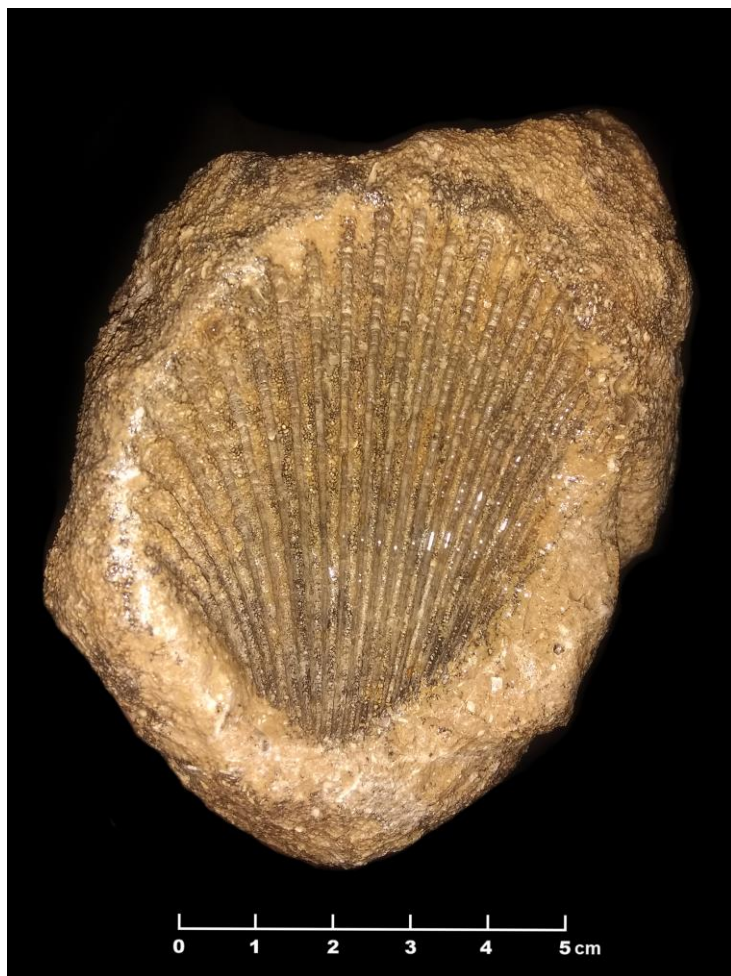

465

466 Figure 6.



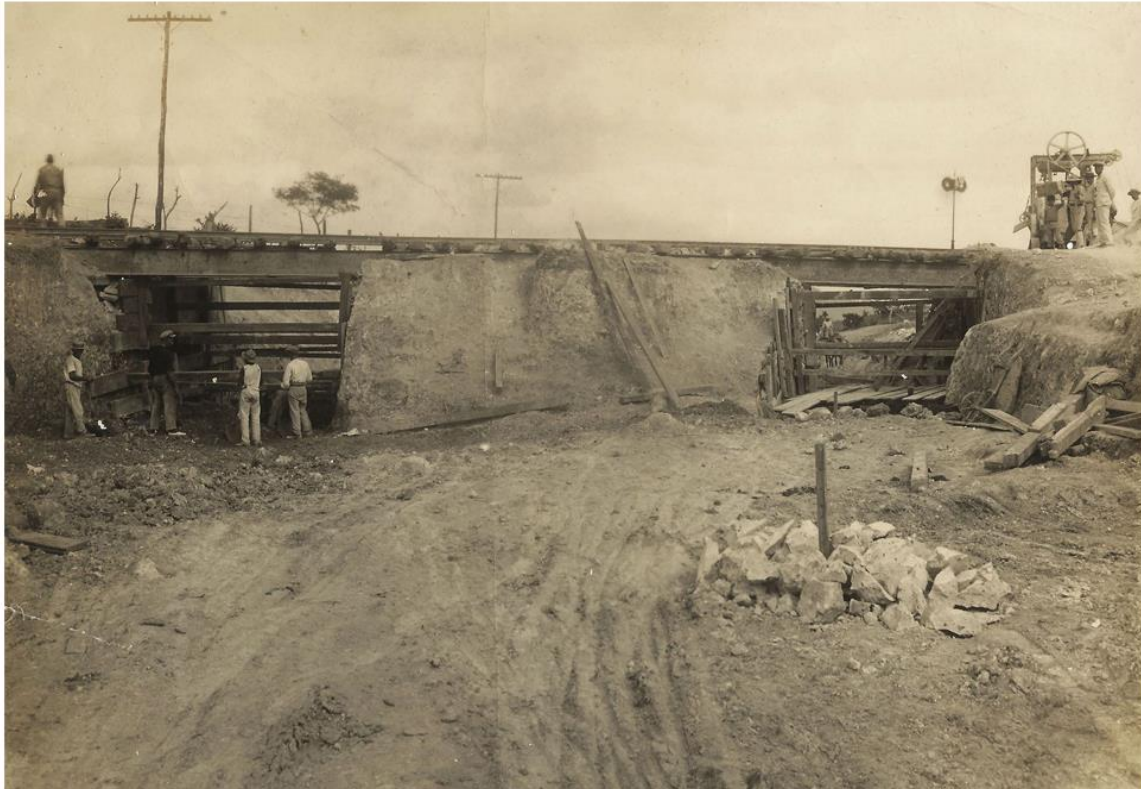

467

468 Figure 7.

469

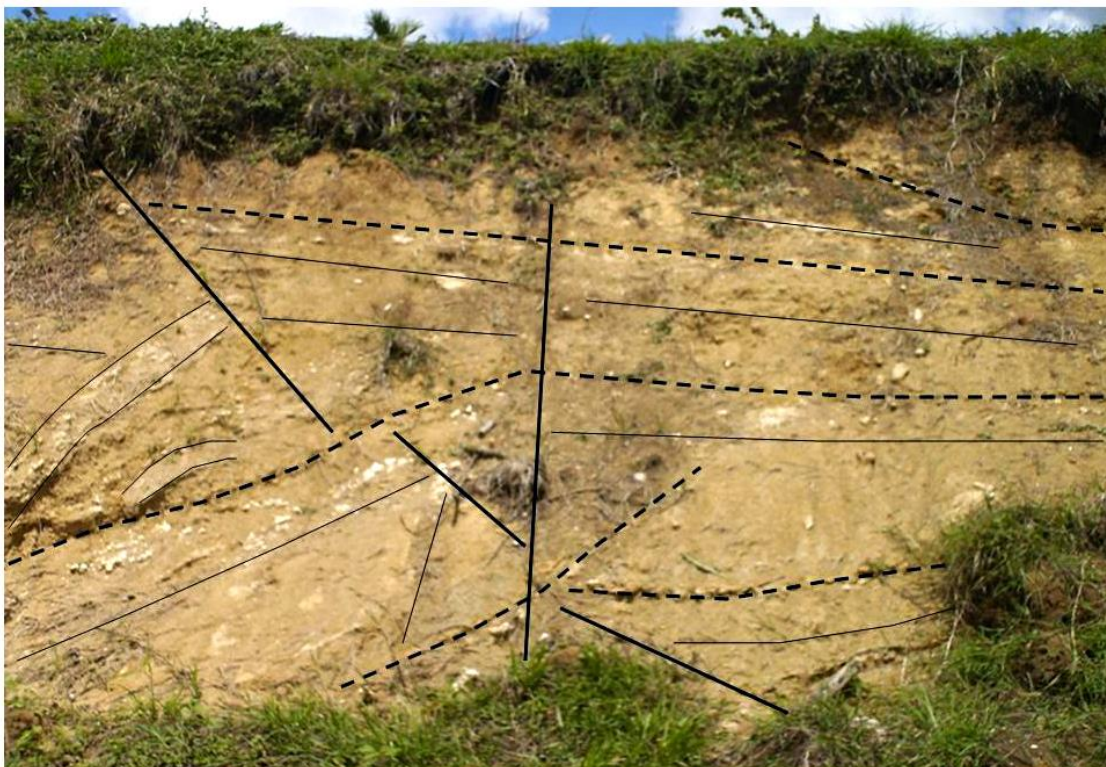

470

471 Figure 8.
